# Supplementary material for: Structure–Activity Relationship of Synthetic Ginkgolic Acid Analogs for Treating Type 2 Diabetes by PTPN9 Inhibition
Source: MDPI journal article supplement (doi:10.3390/ijms23073927), 2022-04-01
Supplement: s1 [file s1]

## Supplementary Materials

# Structure–Activity Relationship of Synthetic Ginkgolic Acid Analogs for Treating Type 2 Diabetes by PTPN9 Inhibition

Jinsoo Kim <sup>1,†</sup>, Jinyoung Son <sup>2,†</sup>, Dohee Ahn <sup>1</sup>, Gibeom Nam <sup>1</sup>, Xiaodi Zhao <sup>1</sup>, Hyuna Park <sup>2</sup>, Woojoo Jeong <sup>2</sup> and Sang J. Chung <sup>1,2,\*</sup>

<sup>1</sup> School of Pharmacy, Sungkyunkwan University, Suwon 16419, Korea; neto543@naver.com (J.K.); ehgml94@naver.com (D.A.); skarlqja12@skku.edu (G.N.); zhaoxiaodi1019@gmail.com (X.Z.)

<sup>2</sup> Department of Biopharmaceutical Convergence, Sungkyunkwan University; Suwon 16419, Korea; qoxmfspt753@naver.com (J.S.); hyunaaa\_1226@naver.com (H.P.); jwjoo5@naver.com (W.J.)

\* Correspondence: sjchung@skku.edu

† These authors contributed equally to this work.

### Table of Contents

|                                                                                    |    |
|------------------------------------------------------------------------------------|----|
| Table S1. Kinetics constants of PTPN9 and DUSP9.....                               | 2  |
| Figure S1. The purified gel of DUSP9 and PTPN9. ....                               | 3  |
| Figure S2. IC <sub>50</sub> values of compounds against PTPN9.....                 | 4  |
| Figure S3. IC <sub>50</sub> Values of compounds against DUSP9.....                 | 5  |
| Figure S4. Effect of GA, 1e, and 1f on AKT activation. ....                        | 6  |
| Figure S5. Signaling pathways studied in 3T3-L1 adipocytes and C2C12 myotubes..... | 7  |
| Experimental procedure for the synthesis of GA analogues.....                      | 8  |
| Spectral data and HPLC chromatogram.....                                           | 14 |

**Table S1.** Kinetics constants for DiFMUP hydrolysis by PTPN9 and DUSP9.

|       | [E] (nM) | $K_m$ ( $\mu$ M) | $V_{max}$<br>( $\mu$ Mmin <sup>-1</sup> ) | $k_{cat}$<br>(min <sup>-1</sup> ) | $k_{cat}$<br>/ $K_m$<br>( $\mu$ M <sup>-1</sup> min <sup>-1</sup> ) |
|-------|----------|------------------|-------------------------------------------|-----------------------------------|---------------------------------------------------------------------|
| PTPN9 | 0.15     | 110              | 1.73                                      | $1.2 \times 10^4$                 | 109.1                                                               |
| DUSP9 | 200.0    | 45               | 1.65                                      | 8.25                              | 0.2                                                                 |

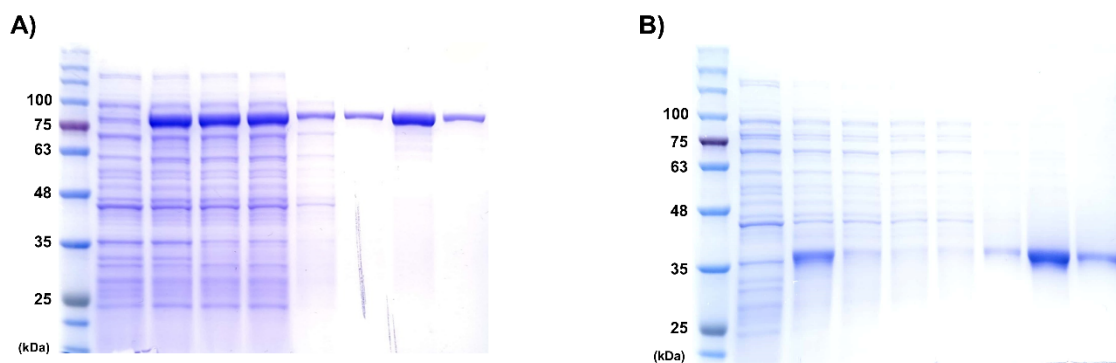

**Figure S1.** The purified gel of DUSP9 (uniprot number: Q99956) and PTPN9 (uniprot number: P43378). **(A)** DUSP9 full sequence was purified (86.8 kDa); **(B)** PTPN9 from Ser277 to Ser581 was purified (37.6 kDa).

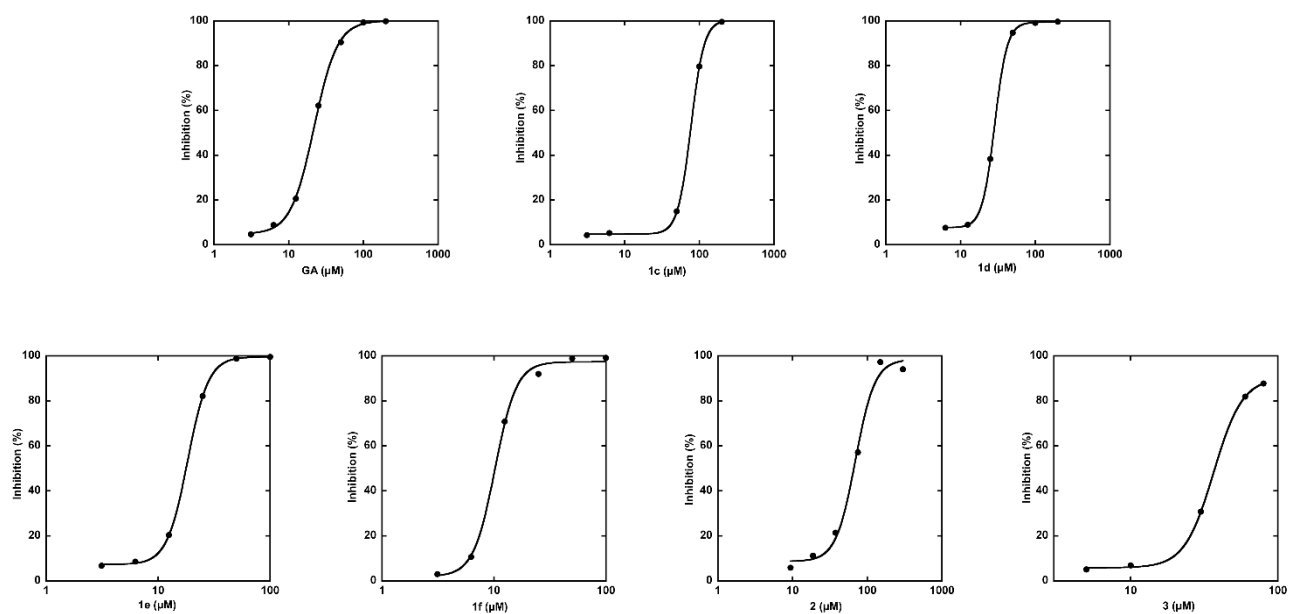

**Figure S2.** IC<sub>50</sub> values of compounds against PTPN9.

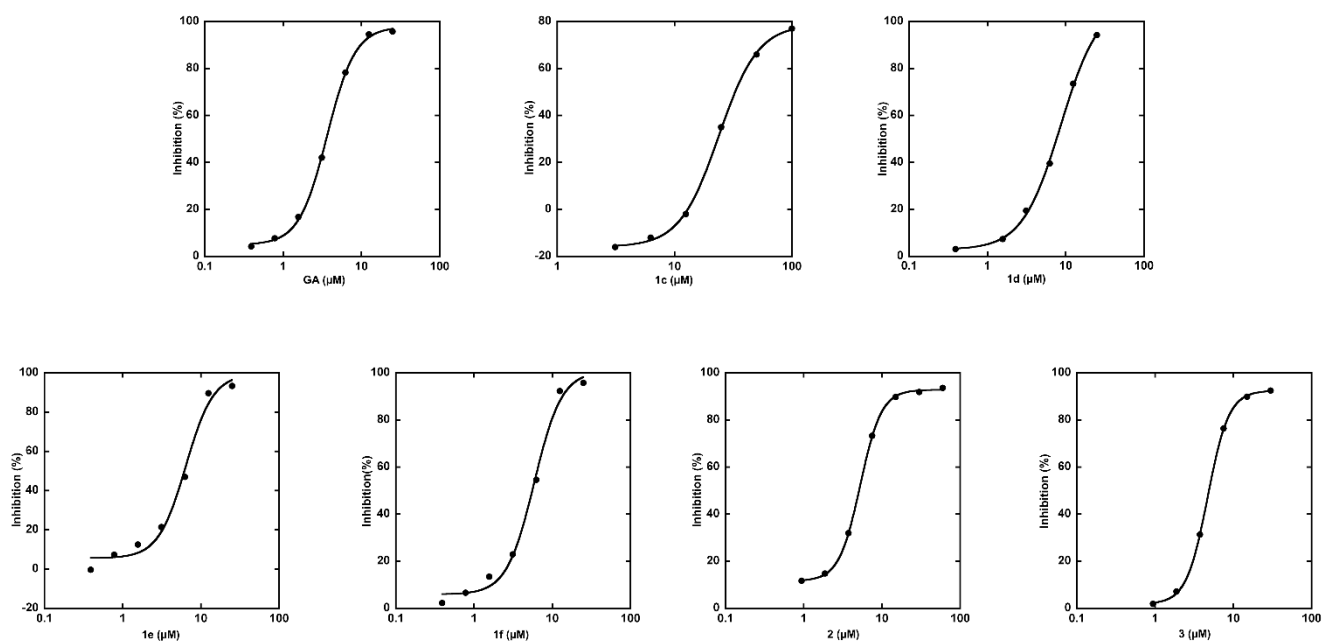

**Figure S3.** IC<sub>50</sub> Values of compounds against DUSP9.

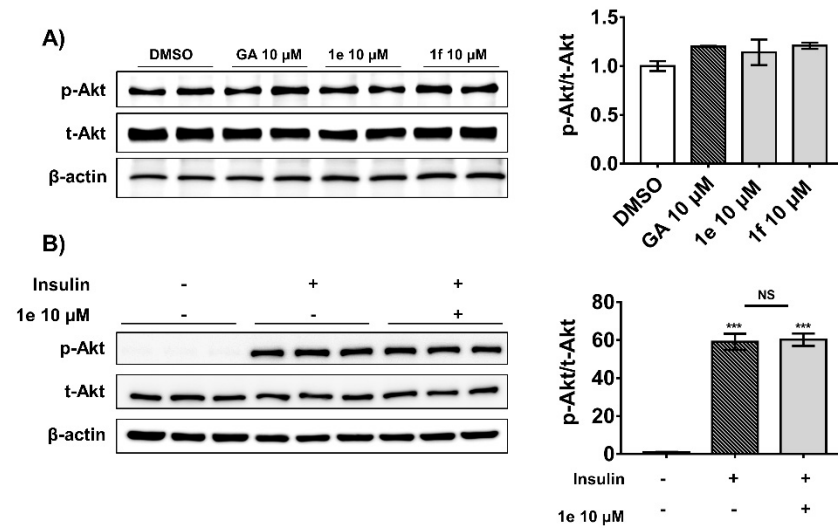

**Figure S4.** Effect of GA, 1e, and 1f on AKT activation. Immunoblot analysis of p-Akt levels was performed following treatment with GA and its analogs at 10  $\mu$ M in the absence (**A**) or presence (**B**) of 100 nM insulin. The densities of the corresponding bands were quantified using the ATTO CS Analyzer 4 and normalized to that of t-Akt. Data are presented as mean  $\pm$  standard deviation ( $n = 3$ ). \*\*\* $P \leq 0.001$  vs. Control DMSO. NS: no significance. Statistical analysis was performed by one-way ANOVA for multiple comparisons followed by Tukey's test.

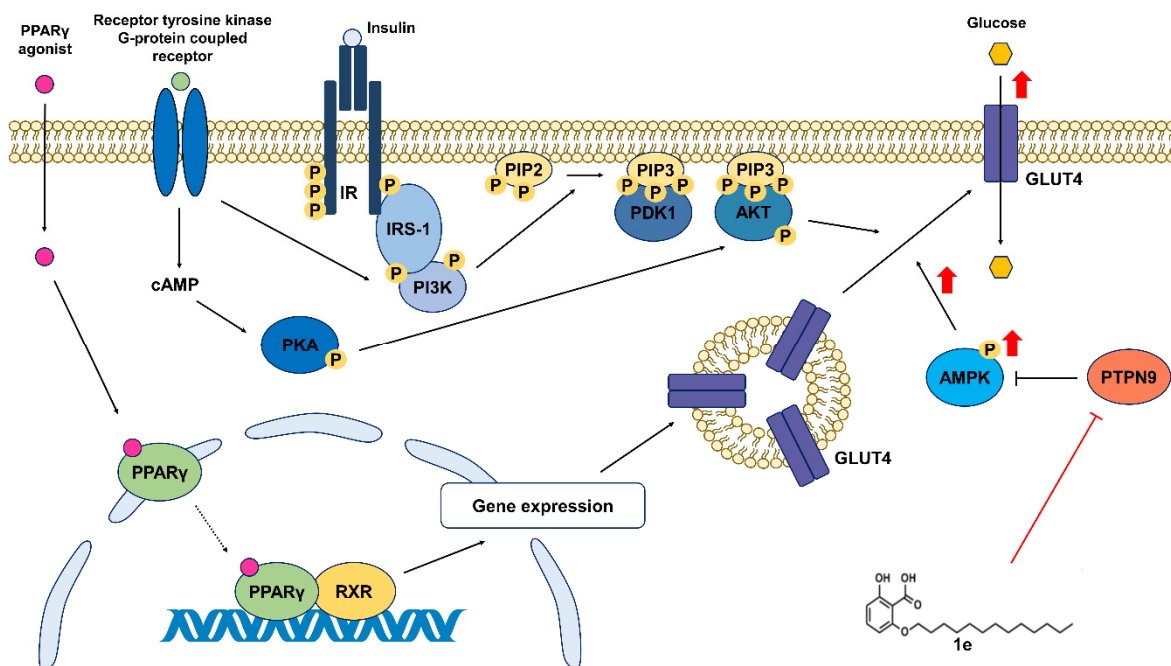

**Figure S5.** Signaling pathways studied in 3T3-L1 adipocytes and C2C12 myotubes.

## Experimental procedure for the synthesis of GA analogues

### General Information

Unless otherwise noted, all reagents were purchased from Sigma-Aldrich (Gangnamgu, Seoul, Korea). The series of 1-bromoalkane were purchased Tokyo Chemical Industry (Yangcheongu, Seoul, Korea). All solvents were purchased from DaeJung Chemicals & Metals (Siheung, Korea).

$^1\text{H}$  NMR was recorded using a Varian Oxford 300 MHz NMR spectrometer (Agilent Technologies, Santa Clara, California, USA) and  $^{13}\text{C}$  NMR was recorded using a Avance III 700 NMR spectrometer (Bruker Corporation, Billerica, Massachusetts, USA) using TMS as the internal standard and  $\text{CDCl}_3$  as the solvent. HPLC analysis was performed on a Waters 2695 separation module (Waters Corporation, Milford, Massachusetts, USA) using a Xbridge  $\text{C}_{18}$  column ( $5\ \mu\text{m}$ ,  $250 \times 4.6\ \text{mm}$ ), at a flow rate of  $1.0\ \text{mL/min}$ , temperature  $25\ ^\circ\text{C}$  and an injection volume of  $10\ \mu\text{L}$  (the eluent was a mixture of  $0.1\%$  TFA in water (A) and  $0.075\%$  CAN (B)). High-resolution mass spectra were recorded with a JMS-700 MStation (JEOL Ltd., Akishima, Tokyo, Japan) and LC-Mass spectra were recorded with a Shimadzu LCMS-2020 (Shimadzu Corporation, Kyobashi, Tokyo, Japan).

### Synthesis of 5-hydroxy-2,2-dimethyl-4H-benzo[d][1,3]dioxin-4-one (5).

Under argon atmosphere, acetone ( $1.26\ \text{mL}$ ,  $16.87\ \text{mmol}$ ) and  $\text{SOCl}_2$  ( $1.22\ \text{mL}$ ,  $16.87\ \text{mmol}$ ) were added to a solution of 2,6-dihydroxybenzoic acid (4) ( $2.00\ \text{g}$ ,  $12.98\ \text{mmol}$ ) and DMAP ( $159.00\ \text{mg}$ ,  $1.30\ \text{mmol}$ ) in 1,2-dimethoxyethane (DME) ( $12\ \text{mL}$ ), and the mixture was stirred at  $0\ ^\circ\text{C}$  for 1 h and then at rt for 15 h.

Saturated aqueous  $\text{NaHCO}_3$  solution was added to the mixture and the aqueous solution was extracted with diethyl ether ( $30\ \text{mL} \times 3$ ). The combined organic solution was washed with saturated aqueous  $\text{NaCl}$  solution, dried over anhydrous  $\text{MgSO}_4$ , and the solution was concentrated under reduced pressure. The residue was purified by silica gel column chromatography [hexane : ethyl acetate ( $3 : 1$ )] to afford 5 ( $2.16\ \text{g}$ ,  $85\%$ ) as a light yellow solid.

$^1\text{H}$  NMR ( $300\ \text{MHz}$ ,  $\text{CDCl}_3$ )  $\delta$  10.33 (s, 1H), 7.41 (t,  $J = 8.3\ \text{Hz}$ , 1H), 6.63 (dd,  $J = 8.5, 0.8\ \text{Hz}$ , 1H), 6.44 (dd,  $J = 8.2, 0.8\ \text{Hz}$ , 1H), 1.75 (s, 6H);  $^{13}\text{C}$  NMR ( $176\ \text{MHz}$ ,  $\text{CDCl}_3$ )  $\delta$  165.49 (s), 161.44 (s), 155.60 (s), 137.93 (s), 110.82 (s), 107.25 (s), 107.13 (s), 99.38 (s), 25.66 (s); MS (ESI)  $m/z$ : 193  $[\text{M}+\text{H}]^+$ ; HRMS (ESI)  $m/z$ : Calcd. for  $[\text{M}+\text{H}]^+ \text{C}_{10}\text{H}_{10}\text{O}_4$ : 194.06; found: 194.05797.

### Synthesis of 2-hydroxy-6-(alkoxy)benzoic acid (1a-f).

5-Hydroxy-2,2-dimethyl-4H-benzo[d][1,3]dioxin-4-one (5) ( $100\ \text{mg}$ ,  $0.52\ \text{mmol}$ ) and  $\text{K}_2\text{CO}_3$  ( $287\ \text{mg}$ ,  $2.08\ \text{mmol}$ ) were suspended in  $2.5\ \text{mL}$  DMF under argon atmosphere. Suspension of 1-bromoalkane ( $0.78\ \text{mmol}$ ) in  $2.7\ \text{mL}$  DMF was added to the above suspension and stirred at  $60\ ^\circ\text{C}$  for 24 h. The above mixture was diluted with demineralized water ( $30\ \text{mL}$ ) and extracted with ethyl acetate ( $30\ \text{mL} \times 3$ ). The combined organic layers were washed with demineralized water ( $20\ \text{mL} \times 2$ ),  $0.1\ \text{M}$  aqueous  $\text{HCl}$  ( $20\ \text{mL}$ ) and saturated aqueous  $\text{NaCl}$  solution, dried over anhydrous  $\text{MgSO}_4$ , and the solution was concentrated under reduced pressure to afford 6a-f as a white solid. The residue was dissolved in THF ( $10\ \text{mL}$ ) and  $5\ \text{M}$  aqueous  $\text{KOH}$  solution ( $1\ \text{mL}$ ) was added to the solution. The reaction mixture was stirred at  $60\ ^\circ\text{C}$  for 24 h. The mixture was acidified with  $1\ \text{N}$  aqueous  $\text{HCl}$ . The above mixture was extracted with ethyl acetate ( $40\ \text{mL} \times 2$ ). The combined organic layers were washed with demineralized water ( $50\ \text{mL}$ ), brine ( $30\ \text{mL} \times 2$ ), dried over anhydrous



MgSO<sub>4</sub>, and the solution was concentrated under reduced pressure. The residue was purified by silica gel column chromatography [hexane : ethyl acetate (4 : 1)] to afford **1a-f** as a light yellow solid.

#### Synthesis of 2-hydroxy-6-(nonyloxy)benzoic acid (**1a**).

5-Hydroxy-2,2-dimethyl-4H-benzo[d][1,3]dioxin-4-one (**5**) (100 mg, 0.52 mmol) and K<sub>2</sub>CO<sub>3</sub> (287 mg, 2.08 mmol) was suspended in 2.5 mL DMF under argon atmosphere. Suspension of 1-bromononane (0.78 mmol) in 2.7 mL DMF was added to the above suspension and stirred at 60 °C for 24 h. The above mixture was diluted with demineralized water (30 mL) and extracted with ethyl acetate (30 mL × 3). The combined organic layers were washed with demineralized water (20 mL × 2), 0.1 M aqueous HCl (20 mL) and saturated aqueous NaCl solution, dried over anhydrous MgSO<sub>4</sub>, and the solution was concentrated under reduced pressure. The residue was dissolved in THF (10 mL) and 5 M aqueous KOH solution (1 mL) was added to the solution. The reaction mixture was stirred at 60 °C for 24 h. The mixture was acidified with 1 N aqueous HCl. The above mixture was extracted with ethyl acetate (40 mL × 2). The combined organic layers were washed with demineralized water (50 mL), brine (30 mL × 2), dried over anhydrous MgSO<sub>4</sub>, and the solution was concentrated under reduced pressure. The residue was purified by silica gel column chromatography [hexane : ethyl acetate (4 : 1)] to afford **1a** (72 mg, 50%) as a light yellow solid.

<sup>1</sup>H NMR (300 MHz, CDCl<sub>3</sub>) δ 12.15 (s, 1H), 11.54 (s, 1H), 7.38 (t, J = 8.4 Hz, 1H), 6.69 (d, J = 8.5 Hz, 1H), 6.47 (d, J = 8.3 Hz, 1H), 4.23 (t, J = 6.6 Hz, 2H), 1.96 – 1.85 (m, 2H), 1.52 – 1.42 (m, 2H), 1.37 – 1.23 (m, 10H), 0.88 (t, J = 5.7 Hz, 3H); <sup>13</sup>C NMR (176 MHz, CDCl<sub>3</sub>) δ 170.98 (s), 164.29 (s), 158.07 (s), 135.54 (s), 112.17 (s), 102.18 (s), 101.77 (s), 70.79 (s), 31.81 (s), 29.37 (s), 29.18 (s), 29.15 (s), 28.85 (s), 25.84 (s), 22.64 (s), 14.08 (s); MS (ESI) *m/z*: 279 [M+H]<sup>+</sup>; HRMS (ESI) *m/z*: Calcd. for [M+H]<sup>+</sup> C<sub>16</sub>H<sub>24</sub>O<sub>4</sub>: 280.17; found: 280.1674.

#### Synthesis of 2-(decyloxy)-6-hydroxybenzoic acid (**1b**).

5-Hydroxy-2,2-dimethyl-4H-benzo[d][1,3]dioxin-4-one (**5**) (100 mg, 0.52 mmol) and K<sub>2</sub>CO<sub>3</sub> (287 mg, 2.08 mmol) was suspended in 2.5 mL DMF under argon atmosphere. Suspension of 1-bromodecane (0.78 mmol) in 2.7 mL DMF was added to the above suspension and stirred at 60 °C for 24 h. The above mixture was diluted with demineralized water (30 mL) and extracted with ethyl acetate (30 mL × 3). The combined organic layers were washed with demineralized water (20 mL × 2), 0.1 M aqueous HCl (20 mL) and saturated aqueous NaCl solution, dried over anhydrous MgSO<sub>4</sub>, and the solution was concentrated under reduced pressure. The residue was dissolved in THF (10 mL) and 5 M aqueous KOH solution (1 mL) was added to the solution. The reaction mixture was stirred at 60 °C for 24 h. The mixture was acidified with 1 N aqueous HCl. The above mixture was extracted with ethyl acetate (40 mL × 2). The combined organic layers were washed with demineralized water (50 mL), brine (30 mL × 2), dried over anhydrous MgSO<sub>4</sub>, and the solution was concentrated under reduced pressure. The residue was purified by silica gel column chromatography [hexane : ethyl acetate (4 : 1)] to afford **1b** (111 mg, 73%) as a light yellow solid.

<sup>1</sup>H NMR (300 MHz, CDCl<sub>3</sub>) δ 12.14 (s, 1H), 7.37 (t, J = 8.4 Hz, 1H), 6.69 (d, J = 8.5 Hz, 1H), 6.46 (d, J = 8.3 Hz, 1H), 4.21 (t, J = 6.6 Hz, 2H), 1.95 – 1.84 (m, 2H), 1.51 – 1.41 (m, 2H), 1.33 – 1.23 (m, 12H), 0.87 (t, J = 6.6 Hz, 3H); <sup>13</sup>C NMR (176 MHz,

$\text{CDCl}_3$ )  $\delta$  170.95 (s), 164.28 (s), 158.06 (s), 135.52 (s), 112.17 (s), 102.16 (s), 101.76 (s), 70.78 (s), 31.84 (s), 29.44 (s), 29.39 (s), 29.24 (s), 29.16 (s), 28.84 (s), 25.83 (s), 22.65 (s), 14.07 (s); MS (ESI)  $m/z$ : 293  $[\text{M}+\text{H}]^+$ ; HRMS (ESI)  $m/z$ : Calcd. for  $[\text{M}+\text{H}]^+$   $\text{C}_{17}\text{H}_{26}\text{O}_4$ : 294.18; found: 294.1829.

#### Synthesis of 2-hydroxy-6-(undecyloxy)benzoic acid (1c).

5-Hydroxy-2,2-dimethyl-4H-benzo[d][1,3]dioxin-4-one (**5**) (100 mg, 0.52 mmol) and  $\text{K}_2\text{CO}_3$  (287 mg, 2.08 mmol) was suspended in 2.5 mL DMF under argon atmosphere. Suspension of 1-bromoundecane (0.78 mmol) in 2.7 mL DMF was added to the above suspension and stirred at 60 °C for 24 h. The above mixture was diluted with demineralized water (30 mL) and extracted with ethyl acetate (30 mL  $\times$  3). The combined organic layers were washed with demineralized water (20 mL  $\times$  2), 0.1 M aqueous HCl (20 mL) and saturated aqueous NaCl solution, dried over anhydrous  $\text{MgSO}_4$ , and the solution was concentrated under reduced pressure. The residue was dissolved in THF (10 mL) and 5 M aqueous KOH solution (1 mL) was added to the solution. The reaction mixture was stirred at 60 °C for 24 h. The mixture was acidified with 1 N aqueous HCl. The above mixture was extracted with ethyl acetate (40 mL  $\times$  2). The combined organic layers were washed with demineralized water (50 mL), brine (30 mL  $\times$  2), dried over anhydrous  $\text{MgSO}_4$ , and the solution was concentrated under reduced pressure. The residue was purified by silica gel column chromatography [hexane : ethyl acetate (4 : 1)] to afford **1c** (146 mg, 92%) as a light yellow solid.

$^1\text{H}$  NMR (300 MHz,  $\text{CDCl}_3$ )  $\delta$  12.15 (s, 1H), 11.54 (s, 1H), 7.37 (t,  $J$  = 7.9 Hz, 1H), 6.68 (d,  $J$  = 8.5 Hz, 1H), 6.47 (d,  $J$  = 8.4 Hz, 1H), 4.22 (t,  $J$  = 6.6 Hz, 2H), 1.96 – 1.85 (m, 2H), 1.55 – 1.42 (m, 2H), 1.36 – 1.24 (m, 14H), 0.88 (t,  $J$  = 7.0 Hz, 3H);  $^{13}\text{C}$  NMR (176 MHz,  $\text{CDCl}_3$ )  $\delta$  170.98 (s), 164.28 (s), 158.08 (s), 135.55 (s), 112.16 (s), 102.19 (s), 101.75 (s), 70.80 (s), 31.90 (s), 29.56 (s), 29.51 (s), 29.41 (s), 29.30 (s), 29.18 (s), 28.86 (s), 25.84 (s), 22.68 (s), 14.10 (s); MS (ESI)  $m/z$ : 307  $[\text{M}+\text{H}]^+$ ; HRMS (ESI)  $m/z$ : Calcd. for  $[\text{M}+\text{H}]^+$   $\text{C}_{18}\text{H}_{28}\text{O}_4$ : 308.20; found: 308.1986.

#### Synthesis of 2-(dodecyloxy)-6-hydroxybenzoic acid (1d).

5-Hydroxy-2,2-dimethyl-4H-benzo[d][1,3]dioxin-4-one (**5**) (100 mg, 0.52 mmol) and  $\text{K}_2\text{CO}_3$  (287 mg, 2.08 mmol) was suspended in 2.5 mL DMF under argon atmosphere. Suspension of 1-bromododecane (0.78 mmol) in 2.7 mL DMF was added to the above suspension and stirred at 60 °C for 24 h. The above mixture was diluted with demineralized water (30 mL) and extracted with ethyl acetate (30 mL  $\times$  3). The combined organic layers were washed with demineralized water (20 mL  $\times$  2), 0.1 M aqueous HCl (20 mL) and saturated aqueous NaCl solution, dried over anhydrous  $\text{MgSO}_4$ , and the solution was concentrated under reduced pressure. The residue was dissolved in THF (10 mL) and 5 M aqueous KOH solution (1 mL) was added to the solution. The reaction mixture was stirred at 60 °C for 24 h. The mixture was acidified with 1 N aqueous HCl. The above mixture was extracted with ethyl acetate (40 mL  $\times$  2). The combined organic layers were washed with demineralized water (50 mL), brine (30 mL  $\times$  2), dried over anhydrous  $\text{MgSO}_4$ , and the solution was concentrated under reduced pressure. The residue was purified by silica gel column chromatography [hexane : ethyl acetate (4 : 1)] to afford **1d** (121 mg, 73%) as a light yellow solid.

$^1\text{H}$  NMR (300 MHz,  $\text{CDCl}_3$ )  $\delta$  12.13 (s, 1H), 7.36 (t,  $J$  = 8.4 Hz, 1H), 6.68 (d,  $J$  = 8.5 Hz, 1H), 6.45 (d,  $J$  = 8.3 Hz, 1H), 4.20 (t,

$J = 6.6$  Hz, 2H), 1.95 – 1.82 (m, 2H), 1.51 – 1.40 (m, 2H), 1.31 – 1.20 (m, 16H), 0.85 (t,  $J = 4.9$  Hz, 3H);  $^{13}\text{C}$  NMR (176 MHz,  $\text{CDCl}_3$ )  $\delta$  170.96 (s), 164.26 (s), 158.05 (s), 135.53 (s), 112.13 (s), 102.17 (s), 101.72 (s), 70.78 (s), 31.89 (s), 29.59 (s), 29.49 (s), 29.40 (s), 29.32 (s), 29.16 (s), 28.83 (s), 25.82 (s), 22.67 (s), 14.08 (s); MS (ESI)  $m/z$ : 321  $[\text{M}+\text{H}]^+$ ; HRMS (ESI)  $m/z$ : Calcd. for  $[\text{M}+\text{H}]^+ \text{C}_{19}\text{H}_{30}\text{O}_4$ : 322.17; found: 322.2140.

#### Synthesis of 2-hydroxy-6-(tridecyloxy)benzoic acid (1e).

5-Hydroxy-2,2-dimethyl-4H-benzo[d][1,3]dioxin-4-one (**5**) (100 mg, 0.52 mmol) and  $\text{K}_2\text{CO}_3$  (287 mg, 2.08 mmol) was suspended in 2.5 mL DMF under argon atmosphere. Suspension of 1-bromotridecane (0.78 mmol) in 2.7 mL DMF was added to the above suspension and stirred at 60 °C for 24 h. The above mixture was diluted with demineralized water (30 mL) and extracted with ethyl acetate (30 mL  $\times$  3). The combined organic layers were washed with demineralized water (20 mL  $\times$  2), 0.1 M aqueous HCl (20 mL) and saturated aqueous NaCl solution, dried over anhydrous  $\text{MgSO}_4$ , and the solution was concentrated under reduced pressure. The residue was dissolved in THF (10 mL) and 5 M aqueous KOH solution (1 mL) was added to the solution. The reaction mixture was stirred at 60 °C for 24 h. The mixture was acidified with 1 N aqueous HCl. The above mixture was extracted with ethyl acetate (40 mL  $\times$  2). The combined organic layers were washed with demineralized water (50 mL), brine (30 mL  $\times$  2), dried over anhydrous  $\text{MgSO}_4$ , and the solution was concentrated under reduced pressure. The residue was purified by silica gel column chromatography [hexane : ethyl acetate (4 : 1)] to afford **1e** (170 mg, 98%) as a light yellow solid.

$^1\text{H}$  NMR (300 MHz,  $\text{CDCl}_3$ )  $\delta$  12.15 (s, 1H), 11.59 (s, 1H), 7.37 (t,  $J = 8.4$  Hz, 1H), 6.68 (d,  $J = 8.5$  Hz, 1H), 6.47 (d,  $J = 8.3$  Hz, 1H), 4.22 (t,  $J = 6.6$  Hz, 2H), 1.97 – 1.84 (m, 2H), 1.54 – 1.42 (m, 2H), 1.37 – 1.23 (m, 18H), 0.88 (t,  $J = 6.6$  Hz, 3H);  $^{13}\text{C}$  NMR (176 MHz,  $\text{CDCl}_3$ )  $\delta$  170.95 (s), 164.27 (s), 158.05 (s), 135.53 (s), 112.16 (s), 102.16 (s), 101.74 (s), 70.78 (s), 31.91 (s), 29.63 (s), 29.62 (s), 29.59 (s), 29.49 (s), 29.40 (s), 29.33 (s), 29.16 (s), 28.84 (s), 25.83 (s), 22.68 (s), 14.09 (s); MS (ESI)  $m/z$ : 335  $[\text{M}+\text{H}]^+$ ; HRMS (ESI)  $m/z$ : Calcd. for  $[\text{M}+\text{H}]^+ \text{C}_{20}\text{H}_{32}\text{O}_4$ : 336.23; found: 336.2300.

#### Synthesis of 2-hydroxy-6-(pentadecyloxy)benzoic acid (1f).

5-Hydroxy-2,2-dimethyl-4H-benzo[d][1,3]dioxin-4-one (**5**) (100 mg, 0.52 mmol) and  $\text{K}_2\text{CO}_3$  (287 mg, 2.08 mmol) was suspended in 2.5 mL DMF under argon atmosphere. Suspension of 1-bromopentadecane (0.78 mmol) in 2.7 mL DMF was added to the above suspension and stirred at 60 °C for 24 h. The above mixture was diluted with demineralized water (30 mL) and extracted with ethyl acetate (30 mL  $\times$  3). The combined organic layers were washed with demineralized water (20 mL  $\times$  2), 0.1 M aqueous HCl (20 mL) and saturated aqueous NaCl solution, dried over anhydrous  $\text{MgSO}_4$ , and the solution was concentrated under reduced pressure. The residue was dissolved in THF (10 mL) and 5 M aqueous KOH solution (1 mL) was added to the solution. The reaction mixture was stirred at 60 °C for 24 h. The mixture was acidified with 1 N aqueous HCl. The above mixture was extracted with ethyl acetate (40 mL  $\times$  2). The combined organic layers were washed with demineralized water (50 mL), brine (30 mL  $\times$  2), dried over anhydrous  $\text{MgSO}_4$ , and the solution was concentrated under reduced pressure. The residue was purified by silica gel column chromatography [hexane : ethyl acetate (4 : 1)] to afford **1f** (172 mg, 92%) as a light yellow solid.

$^1\text{H}$  NMR (300 MHz,  $\text{CDCl}_3$ )  $\delta$  12.17 (s, 1H), 11.61 (s, 1H), 7.38 (t,  $J$  = 8.4 Hz, 1H), 6.71 (d,  $J$  = 8.5 Hz, 1H), 6.47 (d,  $J$  = 8.3 Hz, 1H), 4.23 (t,  $J$  = 6.6 Hz, 2H), 1.97 – 1.85 (m, 2H), 1.53 – 1.42 (m, 2H), 1.35 – 1.20 (m, 22H), 0.88 (t,  $J$  = 5.8 Hz, 3H);  $^{13}\text{C}$  NMR (176 MHz,  $\text{CDCl}_3$ )  $\delta$  170.96 (s), 164.28 (s), 158.06 (s), 135.53 (s), 112.17 (s), 102.15 (s), 101.75 (s), 70.78 (s), 31.92 (s), 29.68 (s), 29.67 (s), 29.65 (s), 29.64 (s), 29.60 (s), 29.50 (s), 29.40 (s), 29.35 (s), 29.17 (s), 28.84 (s), 25.83 (s), 22.69 (s), 14.10 (s); MS (ESI)  $m/z$ : 363  $[\text{M}+\text{H}]^+$ ; HRMS (ESI)  $m/z$ : Calcd. for  $[\text{M}+\text{H}]^+$   $\text{C}_{22}\text{H}_{36}\text{O}_4$ : 364.26; found: 364.2615.

#### Synthesis of 7-hydroxy-2,2-dimethyl-4H-benzo[d][1,3]dioxin-4-one (8).

Under argon atmosphere, acetone (1.21 mL, 16.23 mmol) and trifluoroacetic anhydride (6 mL, 42.83 mmol) were added to a solution of 2,4-dihydroxybenzoic acid (7) (1.0 g, 6.49 mmol) in 10 mL trifluoroacetic acid at 0 °C and stirred at 60 °C for 24 h. The above mixture was added to saturated aqueous  $\text{NaHCO}_3$  (50 mL) and extracted with ethyl acetate (30 mL  $\times$  3). The combined organic layers were washed with demineralized water (50 mL) and saturated aqueous NaCl solution, dried over anhydrous  $\text{MgSO}_4$ , and the solution was concentrated under reduced pressure. The residue was purified by silica gel column chromatography [hexane : ethyl acetate (4 : 1)] to afford 8 (291 mg, 23%) as a white solid.

$^1\text{H}$  NMR (300 MHz,  $\text{CDCl}_3$ )  $\delta$  7.72 (d,  $J$  = 8.6 Hz, 1H), 6.57 (dd,  $J$  = 8.6, 2.0 Hz, 1H), 6.34 (d,  $J$  = 2.0 Hz, 1H), 1.68 (s, 6H);  $^{13}\text{C}$  NMR (176 MHz,  $\text{CDCl}_3$ )  $\delta$  162.79 (s), 161.03 (s), 158.04 (s), 131.79 (s), 111.00 (s), 106.60 (s), 106.41 (s), 103.24 (s), 25.82 (s); MS (ESI)  $m/z$ : 193  $[\text{M}+\text{H}]^+$ ; HRMS (ESI)  $m/z$ : Calcd. for  $[\text{M}+\text{H}]^+$   $\text{C}_{10}\text{H}_{10}\text{O}_4$ : 194.06; found: 194.0580.

#### Synthesis of 2-hydroxy-4-(tridecyloxy)benzoic acid (2) .

7-Hydroxy-2,2-dimethyl-4H-benzo[d][1,3]dioxin-4-one (8) (80 mg, 0.41 mmol) and  $\text{K}_2\text{CO}_3$  (202 mg, 0.62 mmol) was suspended in 2 mL DMF under argon atmosphere. Suspension of 1-bromotridecane (158  $\mu\text{L}$ , 0.62 mmol) in 2 mL DMF was added to the above suspension and stirred at 50 °C for 5.5 h. The above mixture was diluted with demineralized water (30 mL) and extracted with ethyl acetate (30 mL  $\times$  3). The combined organic layers were washed with demineralized water (20 mL  $\times$  2), 0.1 M aqueous HCl (20 mL) and saturated aqueous NaCl solution, dried over anhydrous  $\text{MgSO}_4$ , and the solution was concentrated under reduced pressure. The residue was dissolved in THF (10 mL) and 5 M aqueous KOH solution (1.2 mL) was added to the solution. The reaction mixture was stirred at 60 °C for 6 h. The mixture was acidified with 1 N aqueous HCl. The above mixture was extracted with ethyl acetate (40 mL  $\times$  2). The combined organic layers were washed with demineralized water (50 mL), brine (30 mL  $\times$  2), dried over anhydrous  $\text{MgSO}_4$ , and the solution was concentrated under reduced pressure. The residue was purified by silica gel column chromatography [hexane : ethyl acetate (4 : 1)] to afford 2 (102 mg, 74%) as a light yellow solid.

$^1\text{H}$  NMR (300 MHz,  $\text{CDCl}_3$ )  $\delta$  10.60 (s, 1H), 7.81 (d,  $J$  = 8.7 Hz, 1H), 6.48 (dd, 1H), 6.44 (d,  $J$  = 2.3 Hz, 1H), 3.99 (t,  $J$  = 6.5 Hz, 2H), 1.85 – 1.74 (m, 2H), 1.50 – 1.39 (m, 2H), 1.26 (s, 18H), 0.88 (t,  $J$  = 6.7 Hz, 3H);  $^{13}\text{C}$  NMR (176 MHz,  $\text{CDCl}_3$ )  $\delta$  174.21 (s), 166.29 (s), 164.53 (s), 132.25 (s), 108.54 (s), 104.04 (s), 101.26 (s), 68.45 (s), 31.92 (s), 29.67 (s), 29.64 (s), 29.57 (s), 29.53 (s), 29.35 (s), 29.32 (s), 28.97 (s), 25.94 (s), 22.68 (s), 14.10 (s); MS (ESI)  $m/z$ : 335  $[\text{M}+\text{H}]^+$ ; HRMS (FAB)  $m/z$ : Calcd. for  $[\text{M}+\text{H}]^+$   $\text{C}_{20}\text{H}_{32}\text{O}_4$ : 336.23; found: 337.2378.

### Synthesis of 6-hydroxy-2,2-dimethyl-4H-benzo[d][1,3]dioxin-4-one (**11**).

Under argon atmosphere, acetone (1.21 mL, 16.23 mmol) and trifluoroacetic anhydride (6 mL, 42.83 mmol) were added to a solution of 2,5-dihydroxybenzoic acid (**10**) (1.0 g, 6.49 mmol) in 10 mL trifluoroacetic acid at 0 °C and stirred at 60 °C for 24 h. The above mixture was added to saturated aqueous NaHCO<sub>3</sub> (50 mL) and extracted with ethyl acetate (30 mL × 3). The combined organic layers were washed with demineralized water (50 mL) and saturated aqueous NaCl solution, dried over anhydrous MgSO<sub>4</sub>, and the solution was concentrated under reduced pressure. The residue was purified by silica gel column chromatography [hexane : ethyl acetate (4 : 1)] to afford **11** (252 mg, 20%) as a white solid.

<sup>1</sup>H NMR (300 MHz, CDCl<sub>3</sub>) δ 7.50 (d, *J* = 3.0 Hz, 1H), 7.12 (dd, *J* = 8.8, 3.1 Hz, 1H), 6.86 (d, *J* = 8.8 Hz, 1H), 6.40 (s, 1H), 1.71 (s, 6H); <sup>13</sup>C NMR (176 MHz, CDCl<sub>3</sub>) δ 162.04 (s), 151.40 (s), 149.92 (s), 124.85 (s), 118.40 (s), 114.48 (s), 113.69 (s), 106.73 (s), 25.63 (s); MS (ESI) *m/z*: 193 [M+H]<sup>+</sup>; HRMS (ESI) *m/z*: Calcd. for [M+H]<sup>+</sup> C<sub>10</sub>H<sub>10</sub>O<sub>4</sub>: 194.06; found: 194.0576.

### Synthesis of 2-hydroxy-5-(tridecyloxy)benzoic acid (**3**) .

6-Hydroxy-2,2-dimethyl-4H-benzo[d][1,3]dioxin-4-one (**11**) (80 mg, 0.41 mmol) and Cs<sub>2</sub>CO<sub>3</sub> (202 mg, 0.62 mmol) was suspended in 2 mL DMF under argon atmosphere. Suspension of 1-bromotridecane (158 μL, 0.62 mmol) in 2 mL DMF was added to the above suspension and stirred at 50 °C for 18 h. The above mixture was diluted with demineralized water (30 mL) and extracted with ethyl acetate (30 mL × 3). The combined organic layers were washed with demineralized water (20 mL × 2), 0.1 M aqueous HCl (20 mL) and saturated aqueous NaCl solution, dried over anhydrous MgSO<sub>4</sub>, and the solution was concentrated under reduced pressure. The residue was dissolved in THF (10 mL) and 5 M aqueous KOH solution (1 mL) was added to the solution. The reaction mixture was stirred at 60 °C for 6 h. The mixture was acidified with 1 N aqueous HCl. The above mixture was extracted with ethyl acetate (40 mL × 2). The combined organic layers were washed with demineralized water (50 mL), brine (30 mL × 2), dried over anhydrous MgSO<sub>4</sub>, and the solution was concentrated under reduced pressure. The residue was purified by silica gel column chromatography [hexane : ethyl acetate (4 : 1)] to afford **3** (127 mg, 92%) as a light yellow solid.

<sup>1</sup>H NMR (300 MHz, CDCl<sub>3</sub>) δ 10.00 (s, 1H), 7.35 (d, *J* = 3.1 Hz, 1H), 7.15 (dd, *J* = 9.1, 3.1 Hz, 1H), 6.94 (d, *J* = 9.1 Hz, 1H), 3.93 (t, *J* = 6.5 Hz, 2H), 1.81 – 1.72 (m, 2H), 1.47 – 1.42 (m, 2H), 1.26 (s, 18H), 0.88 (t, *J* = 6.7 Hz, 3H); <sup>13</sup>C NMR (176 MHz, CDCl<sub>3</sub>) δ 174.27 (s), 156.71 (s), 151.81 (s), 126.18 (s), 118.80 (s), 113.32 (s), 110.75 (s), 68.93 (s), 31.94 (s), 29.69 (s), 29.67 (s), 29.66 (s), 29.61 (s), 29.58 (s), 29.40 (s), 29.36 (s), 29.27 (s), 26.03 (s), 22.70 (s), 14.11 (s); MS (ESI) *m/z*: 335 [M+H]<sup>+</sup>; HRMS (FAB) *m/z*: Calcd. for [M+H]<sup>+</sup> C<sub>20</sub>H<sub>32</sub>O<sub>4</sub>: 336.23; found: 337.2383.

**$^1\text{H}$ -NMR spectrum of 5-hydroxy-2,2-dimethyl-4H-benzo[d][1,3]dioxin-4-one (5).**

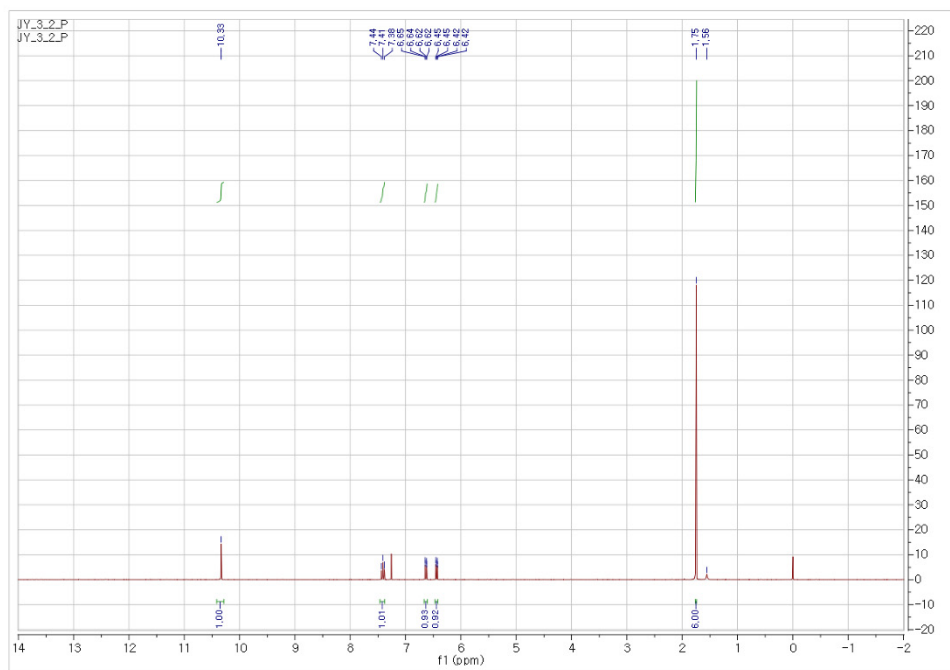

**$^{13}\text{C}$ -NMR spectrum of 5-hydroxy-2,2-dimethyl-4H-benzo[d][1,3]dioxin-4-one (5).**

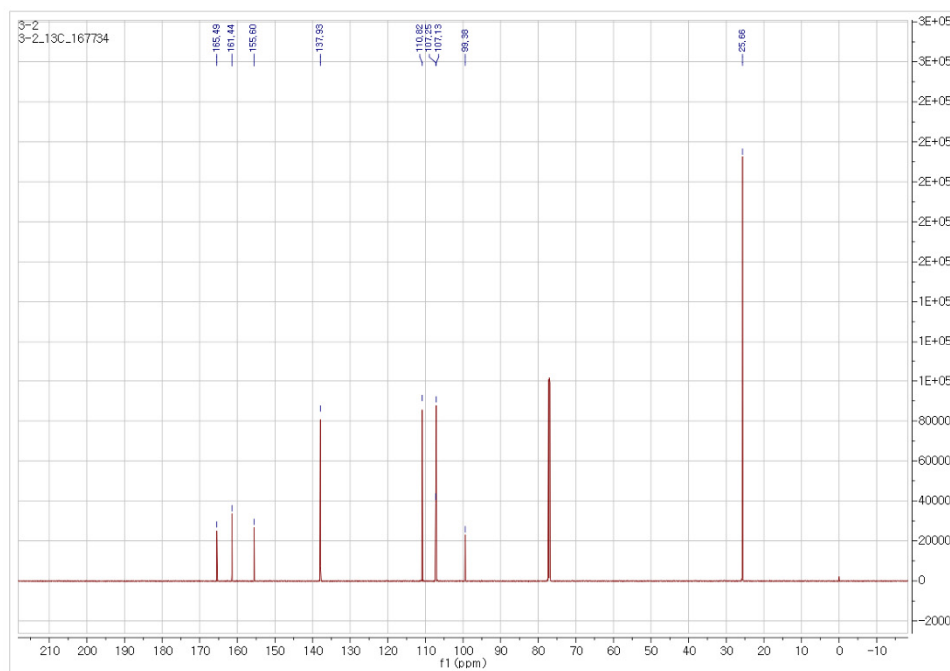

## HRMS spectrum of 5-hydroxy-2,2-dimethyl-4H-benzo[d][1,3]dioxin-4-one (5).

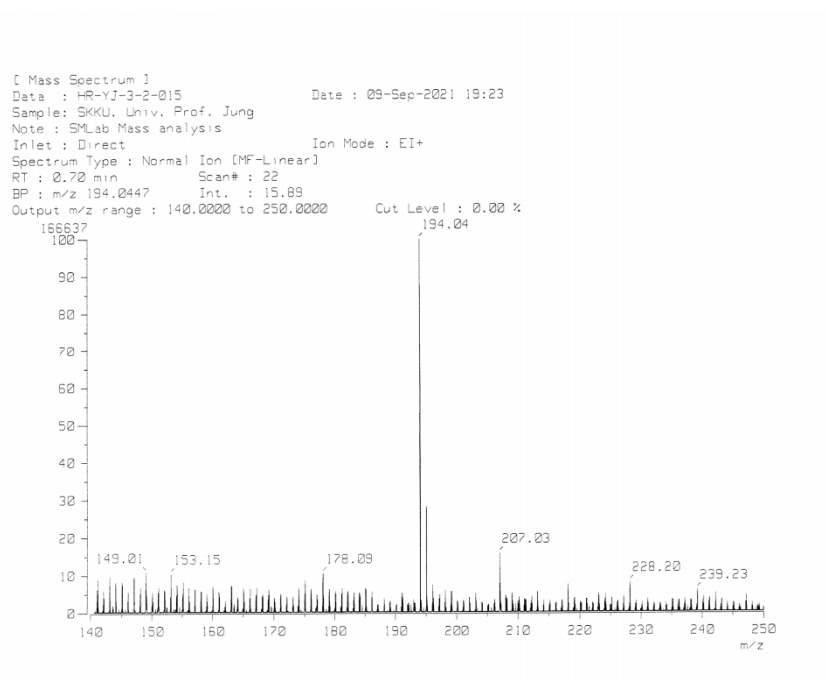

**<sup>1</sup>H-NMR spectrum of 2-hydroxy-6-(nonyloxy)benzoic acid (1a).**

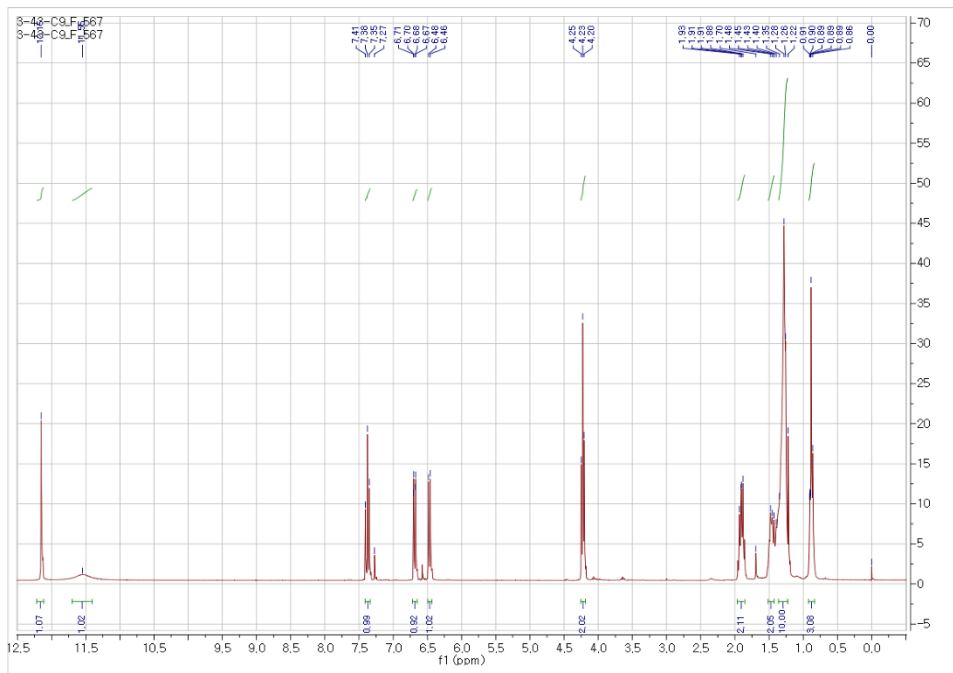

**<sup>13</sup>C-NMR spectrum of 2-hydroxy-6-(nonyloxy)benzoic acid (1a).**

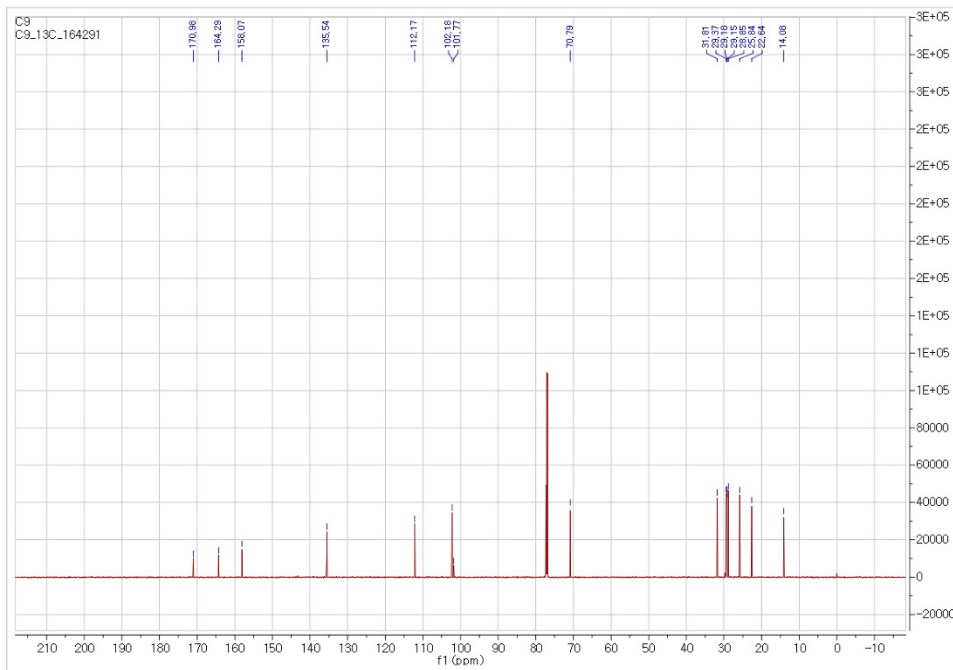

**HRMS spectrum of 2-hydroxy-6-(nonyloxy)benzoic acid (1a).**



[ Mass Spectrum ]  
 Date : 6-EI-C9-007 Date : 16-Apr-2021 16:52  
 Sample: SKKU. Univ.  
 Note : SMLab Mass analysis  
 Inlet : Direct Ion Mode : EI+  
 Spectrum Type : Normal Ion [MF-Linear]  
 RT : 2.12 min Scan# : (63,66)+53  
 BP : m/z 230.9861 Int. : 27.62  
 Output m/z range : 280.0253 to 280.3597 Cut Level : 18.57 %  
 706816

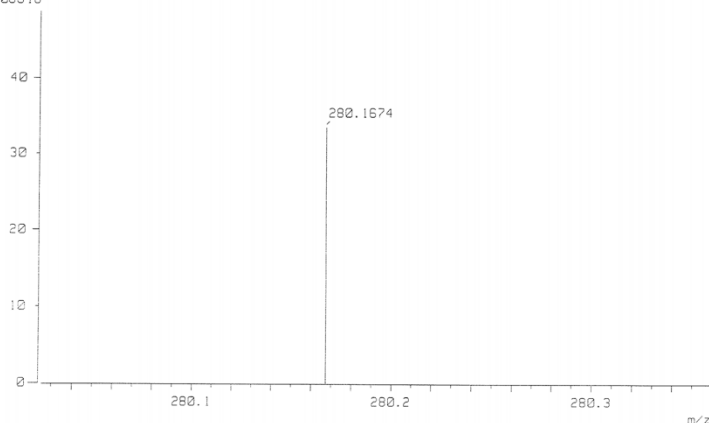

## HPLC data of 2-hydroxy-6-(nonyloxy)benzoic acid (1a).

Auto-Scaled Chromatogram

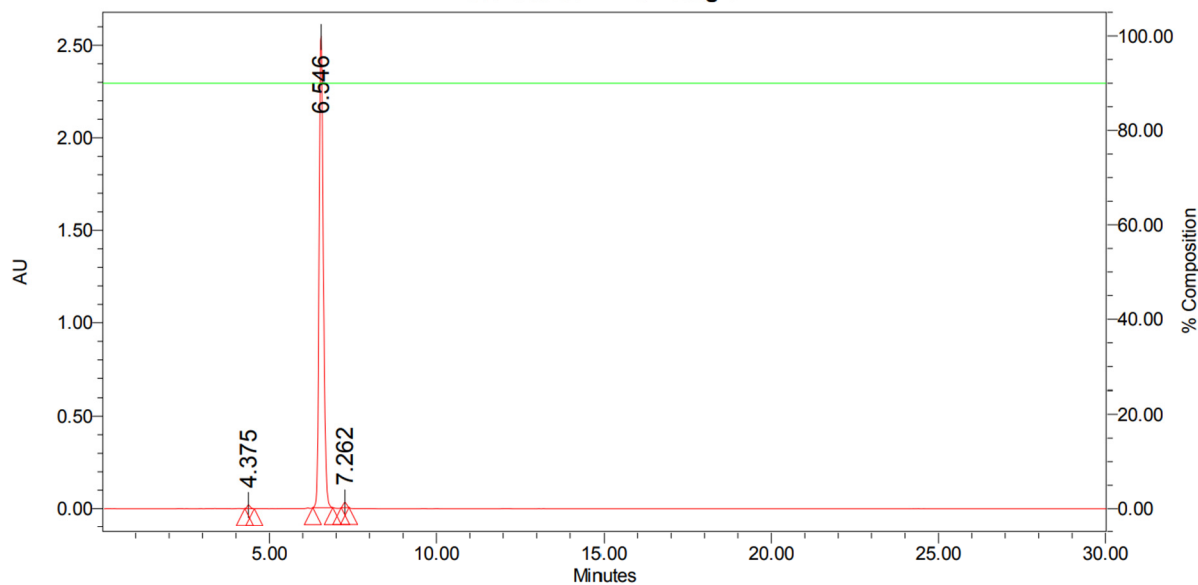

Processed Channel: PDA 254.0 nm

|   | Processed Channel | Retention Time (min) | Area     | % Area | Height  |
|---|-------------------|----------------------|----------|--------|---------|
| 1 | PDA 254.0 nm      | 4.375                | 123398   | 0.54   | 19514   |
| 2 | PDA 254.0 nm      | 6.546                | 22430413 | 98.56  | 2554779 |
| 3 | PDA 254.0 nm      | 7.262                | 205320   | 0.90   | 27569   |

**$^1\text{H}$ -NMR spectrum of 2-(decyloxy)-6-hydroxybenzoic acid (1b).**

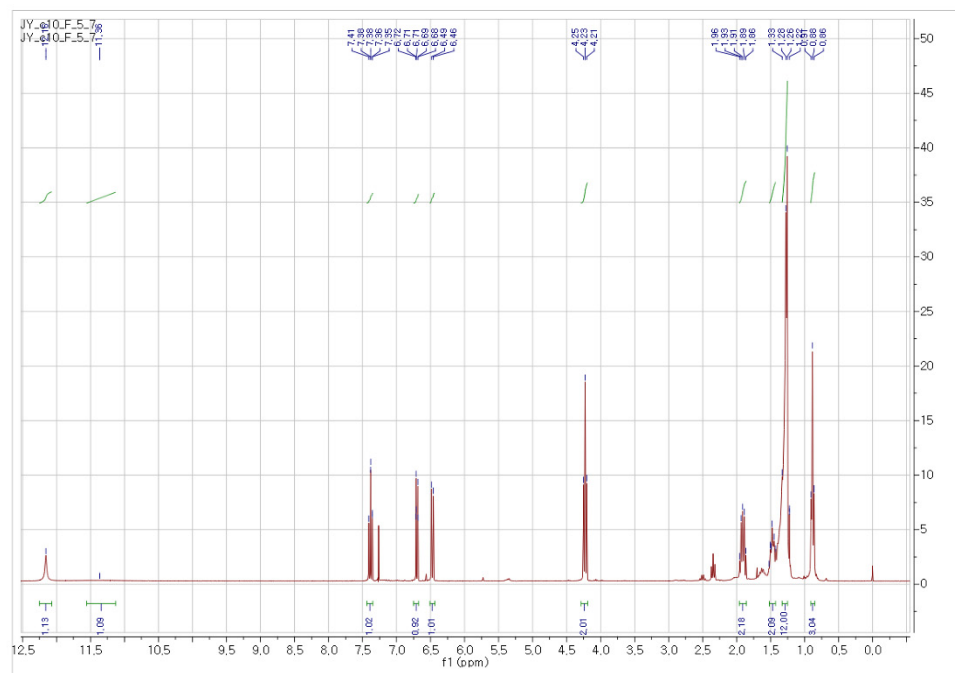

**$^{13}\text{C}$ -NMR spectrum of 2-(decyloxy)-6-hydroxybenzoic acid (1b).**

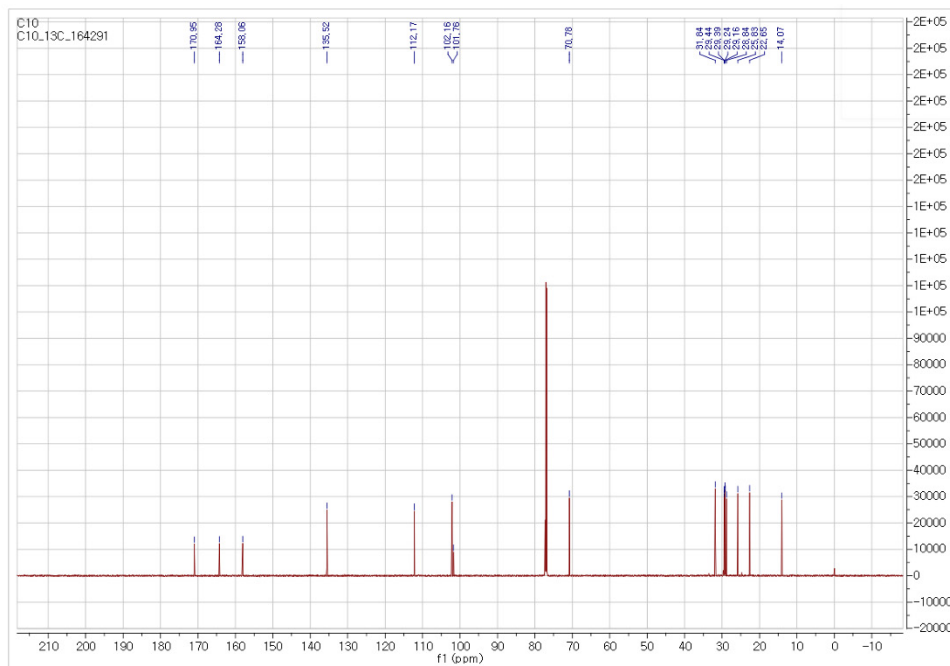

## HRMS spectrum of 2-(decyloxy)-6-hydroxybenzoic acid (1b).

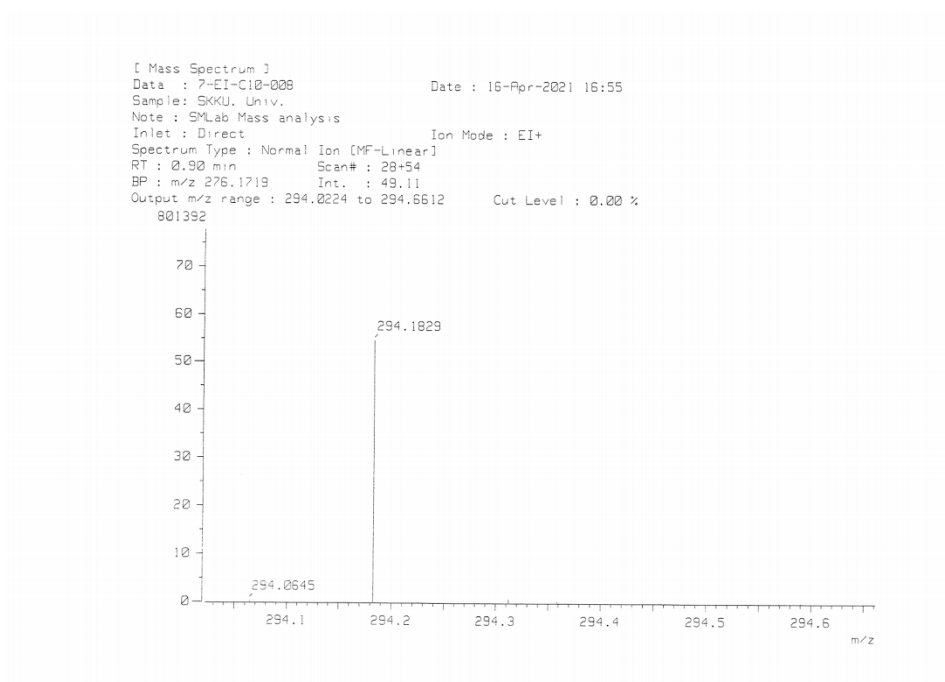

## HPLC data of 2-(decyloxy)-6-hydroxybenzoic acid (1b).

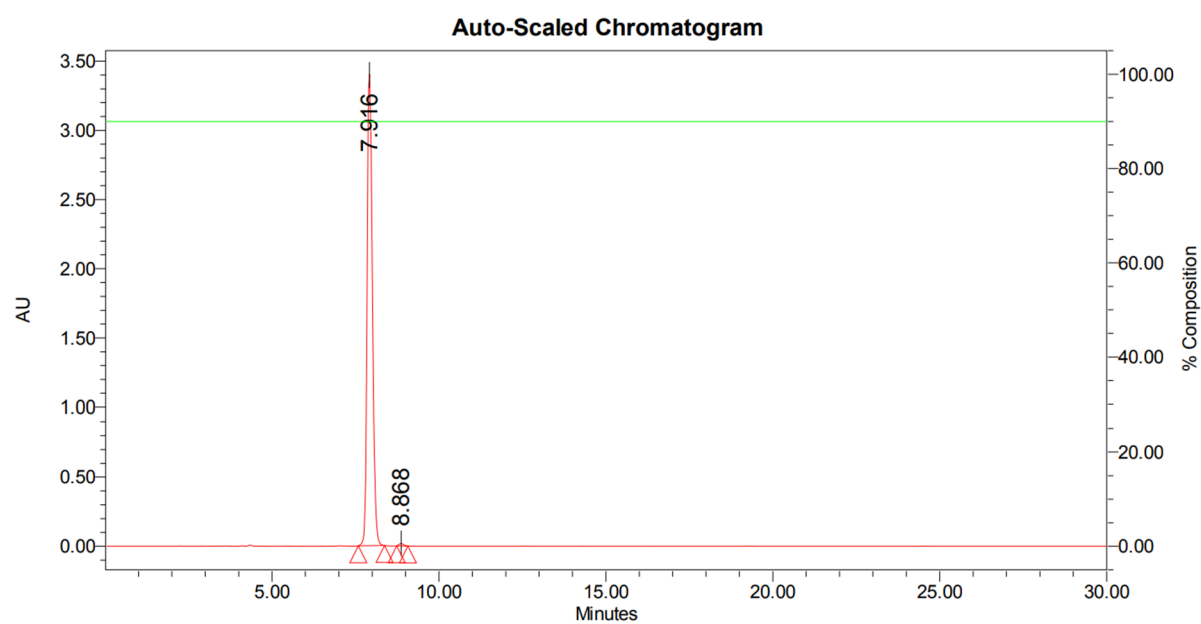

### Processed Channel: PDA 254.0 nm

|   | Processed Channel | Retention Time (min) | Area     | % Area | Height  |
|---|-------------------|----------------------|----------|--------|---------|
| 1 | PDA 254.0 nm      | 7.916                | 37176775 | 99.55  | 3370060 |
| 2 | PDA 254.0 nm      | 8.868                | 166834   | 0.45   | 17423   |

## <sup>1</sup>H-NMR spectrum of 2-hydroxy-6-(undecyloxy)benzoic acid (1c).

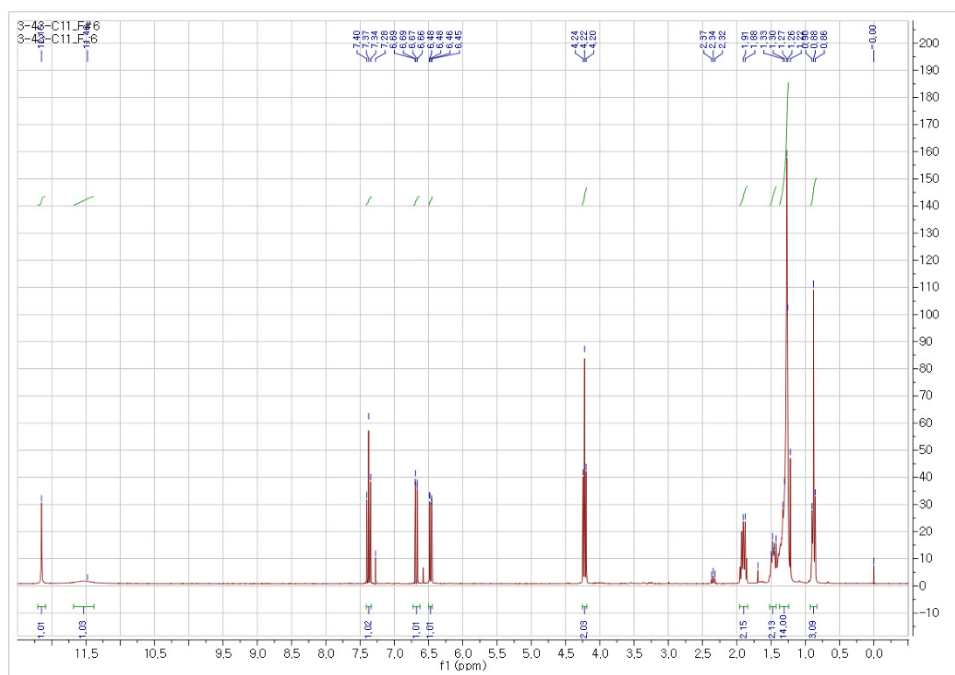

**<sup>13</sup>C-NMR spectrum of 2-hydroxy-6-(undecyloxy)benzoic acid (1c).**

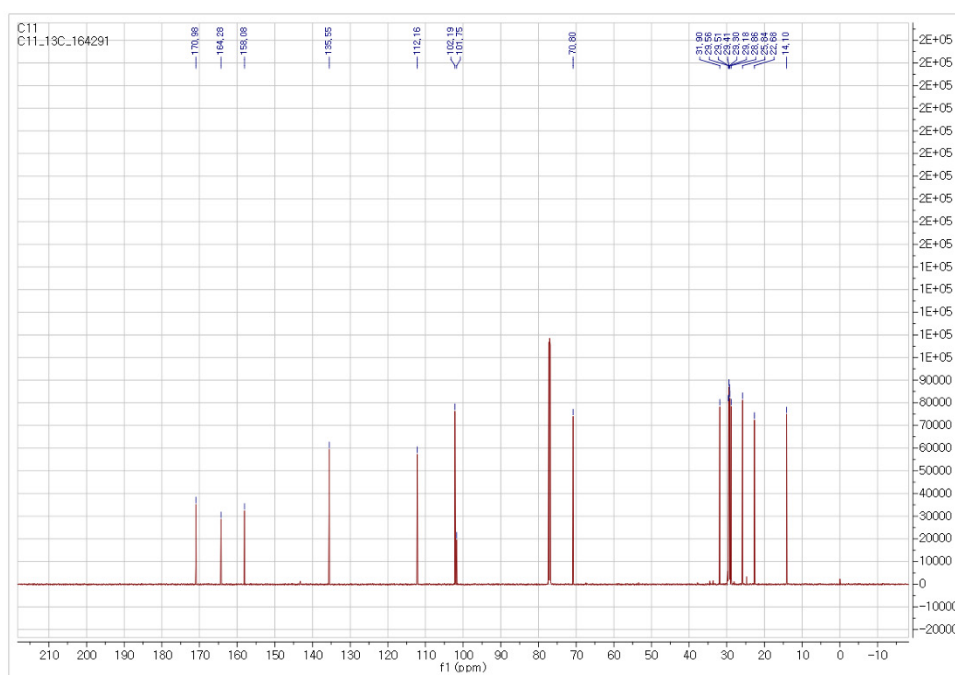

## HRMS spectrum of 2-hydroxy-6-(undecyloxy)benzoic acid (1c).

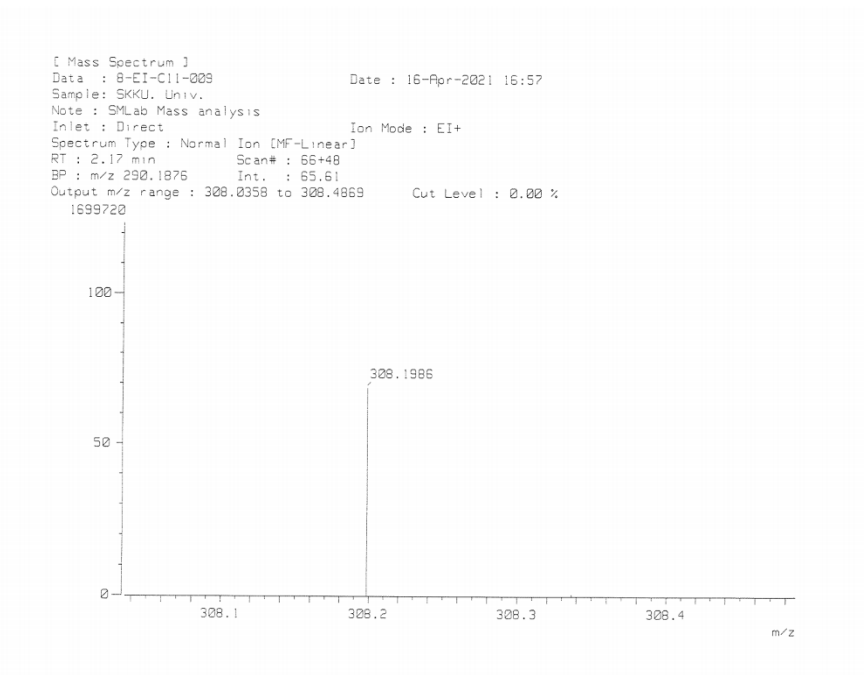

## HPLC data of 2-hydroxy-6-(undecyloxy)benzoic acid (1c).

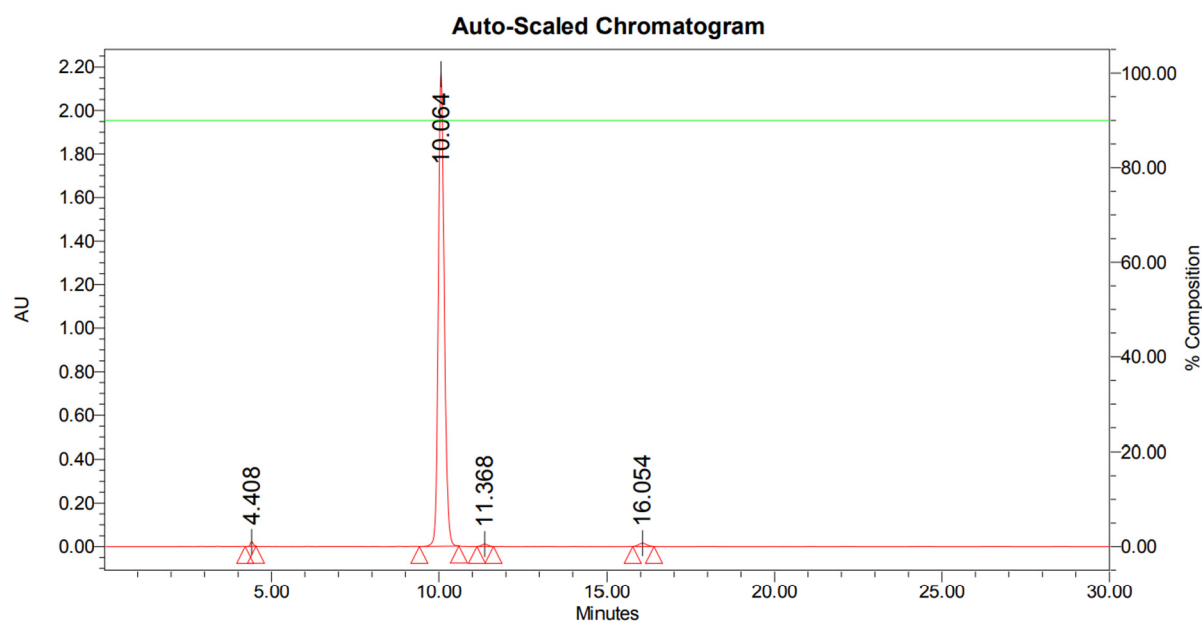

### Processed Channel: PDA 254.0 nm

|   | Processed Channel | Retention Time (min) | Area     | % Area | Height  |
|---|-------------------|----------------------|----------|--------|---------|
| 1 | PDA 254.0 nm      | 4.408                | 129409   | 0.47   | 20965   |
| 2 | PDA 254.0 nm      | 10.064               | 26788537 | 98.10  | 2170053 |
| 3 | PDA 254.0 nm      | 11.368               | 137887   | 0.50   | 10815   |
| 4 | PDA 254.0 nm      | 16.054               | 252191   | 0.92   | 15012   |

## <sup>1</sup>H-NMR spectrum of 2-(dodecyloxy)-6-hydroxybenzoic acid (1d).

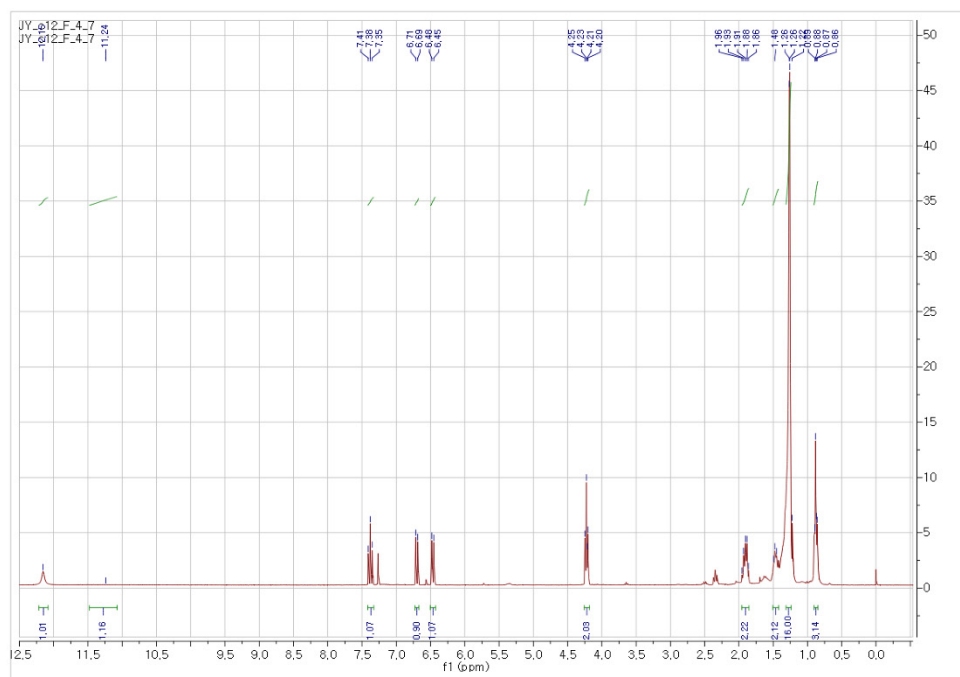

**<sup>13</sup>C-NMR spectrum of 2-(dodecyloxy)-6-hydroxybenzoic acid (1d).**

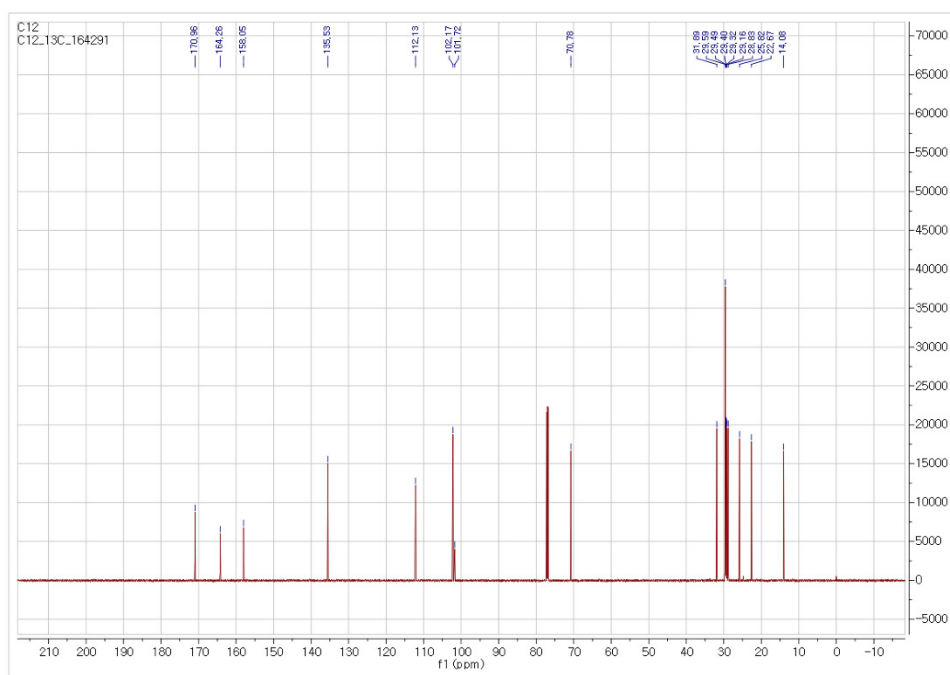

**HRMS spectrum of 2-(dodecyloxy)-6-hydroxybenzoic acid (1d).**

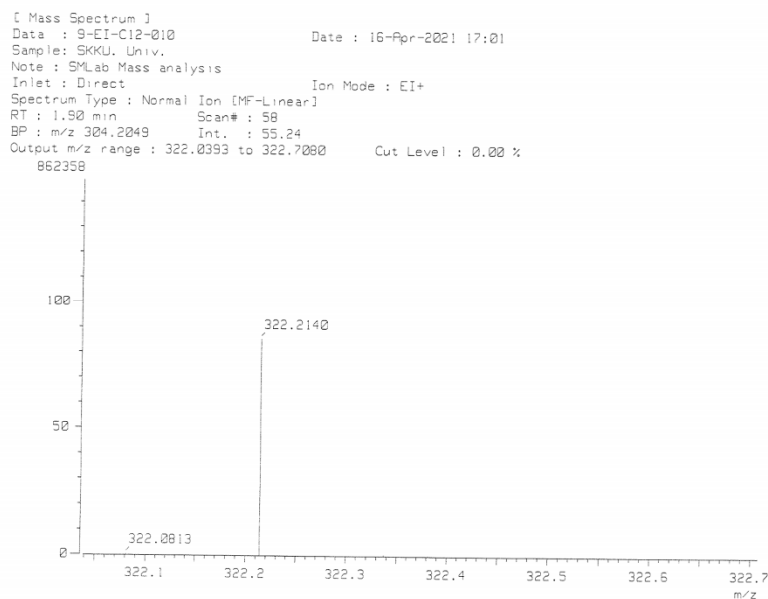

### HPLC data of 2-(dodecyloxy)-6-hydroxybenzoic acid (1d).

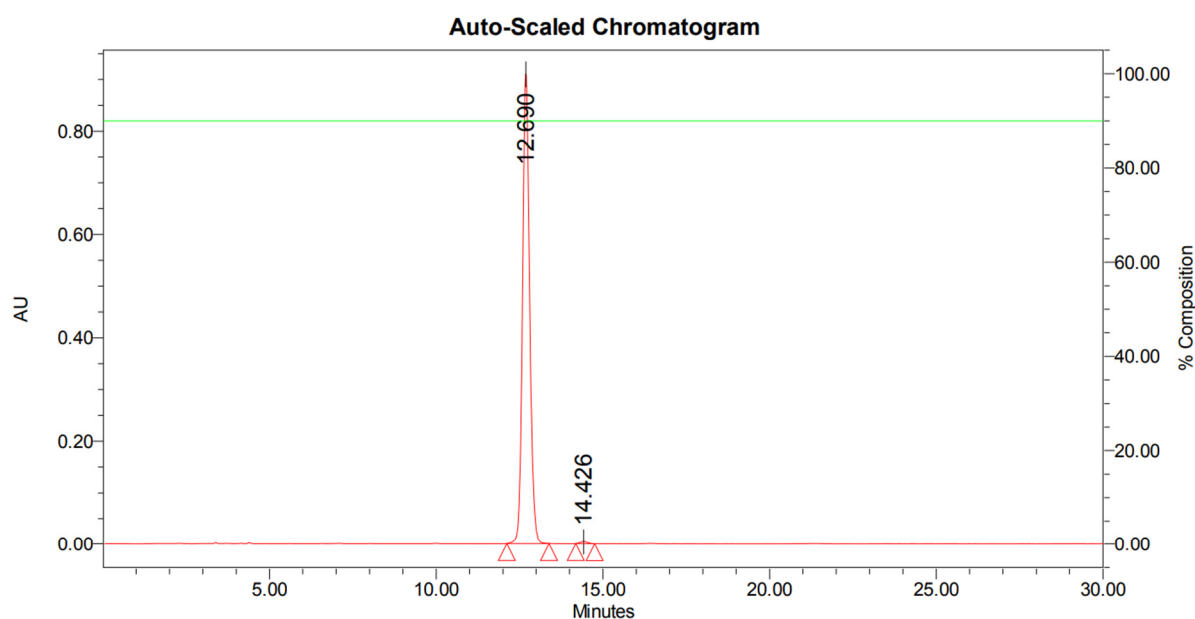

#### Processed Channel: PDA 254.0 nm

|   | Processed Channel | Retention Time (min) | Area     | % Area | Height |
|---|-------------------|----------------------|----------|--------|--------|
| 1 | PDA 254.0 nm      | 12.690               | 13517990 | 99.52  | 913001 |
| 2 | PDA 254.0 nm      | 14.426               | 64981    | 0.48   | 4273   |

### $^1\text{H}$ -NMR spectrum of 2-hydroxy-6-(tridecyloxy)benzoic acid (1e).

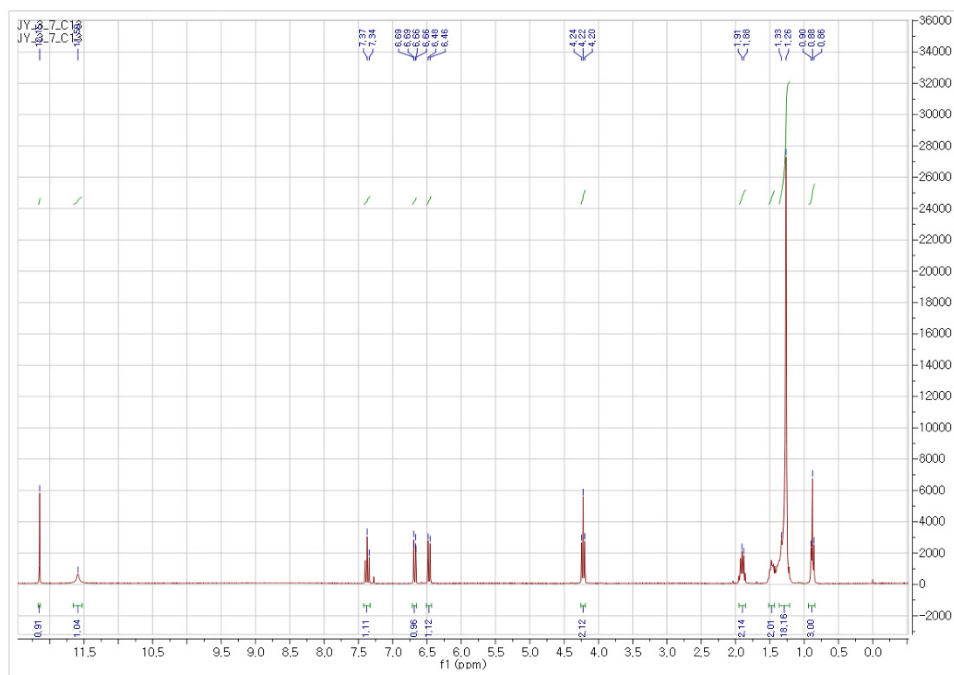

**<sup>13</sup>C-NMR spectrum of 2-hydroxy-6-(tridecyloxy)benzoic acid (1e).**

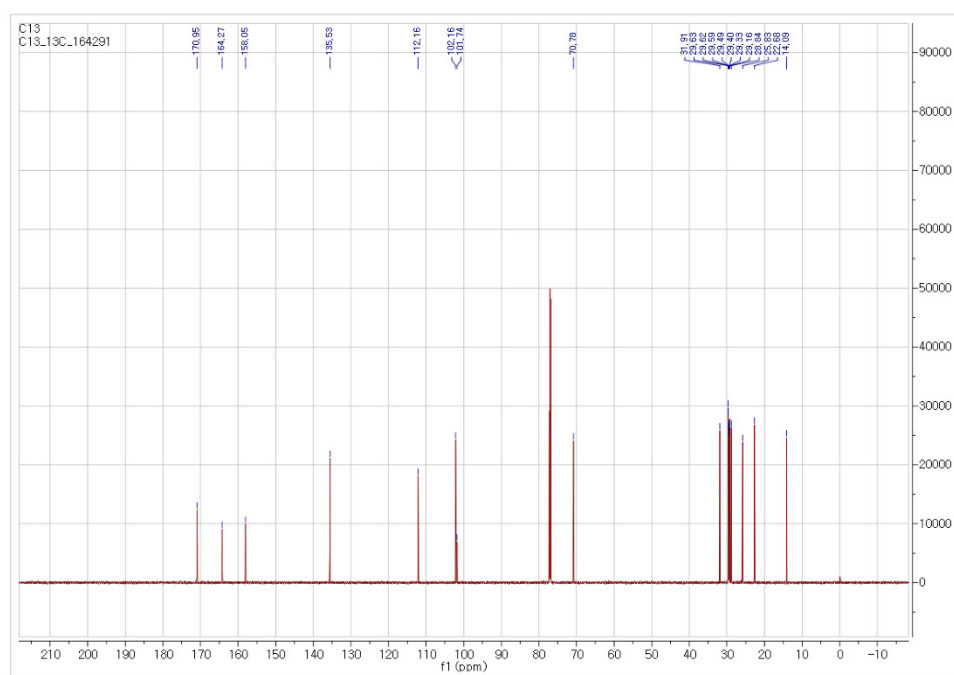

**HRMS spectrum of 2-hydroxy-6-(tridecyloxy)benzoic acid (1e).**



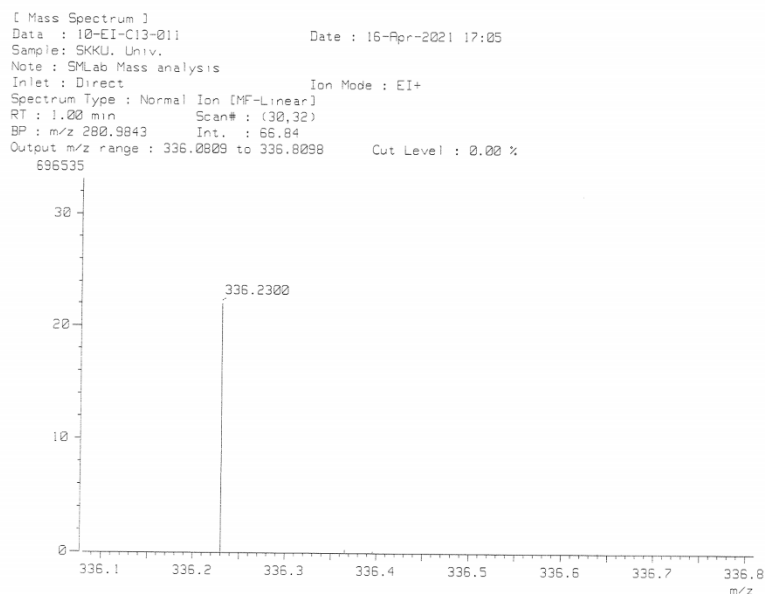

### HPLC data of 2-hydroxy-6-(tridecyloxy)benzoic acid (1e).

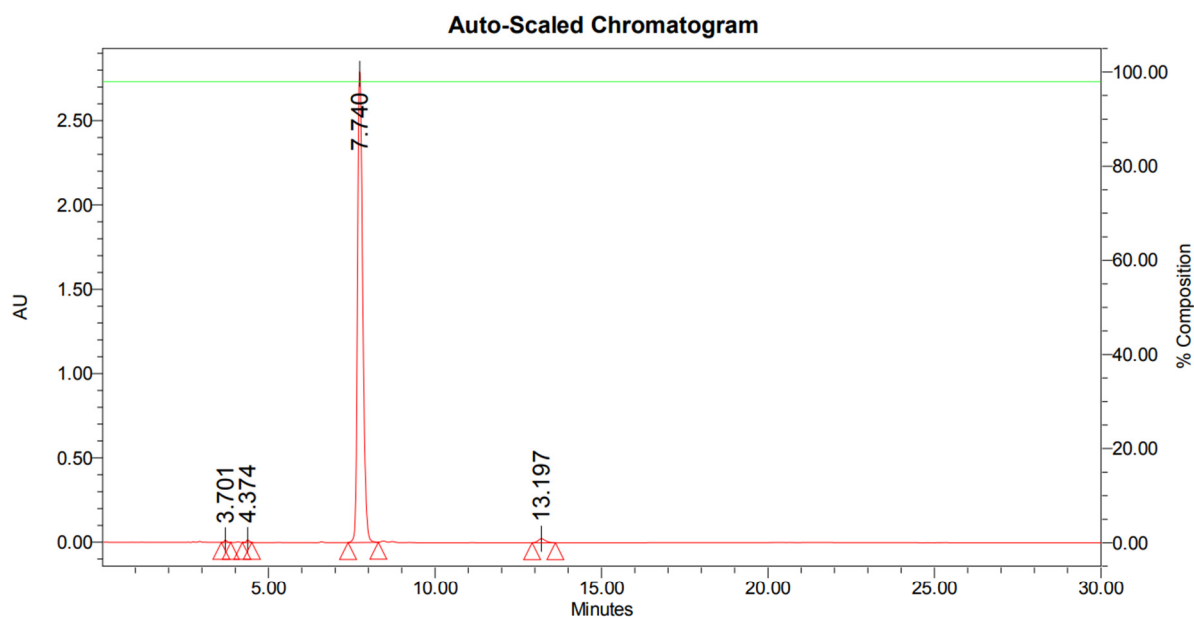

#### Processed Channel: PDA 254.0 nm

|   | Processed Channel | Retention Time (min) | Area     | % Area | Height  |
|---|-------------------|----------------------|----------|--------|---------|
| 1 | PDA 254.0 nm      | 3.701                | 75189    | 0.24   | 12824   |
| 2 | PDA 254.0 nm      | 4.374                | 91093    | 0.29   | 15355   |
| 3 | PDA 254.0 nm      | 7.740                | 30364029 | 98.29  | 2801335 |
| 4 | PDA 254.0 nm      | 13.197               | 362613   | 1.17   | 23742   |

### <sup>1</sup>H-NMR spectrum of 2-hydroxy-6-(pentadecyloxy)benzoic acid (1f).

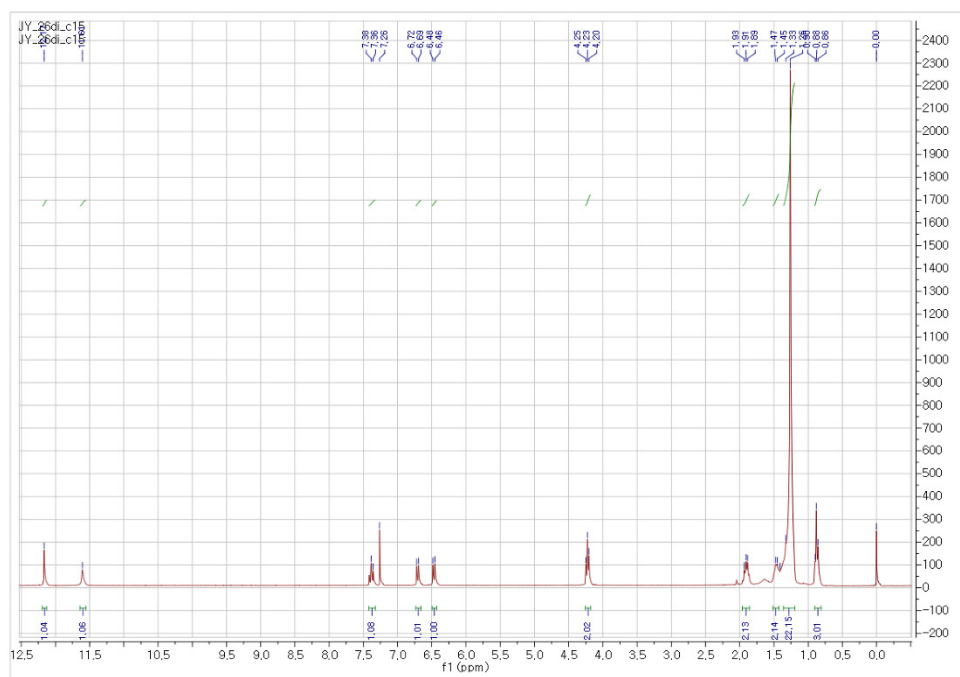

**$^{13}\text{C}$ -NMR spectrum of 2-hydroxy-6-(pentadecyloxy)benzoic acid (1f).**

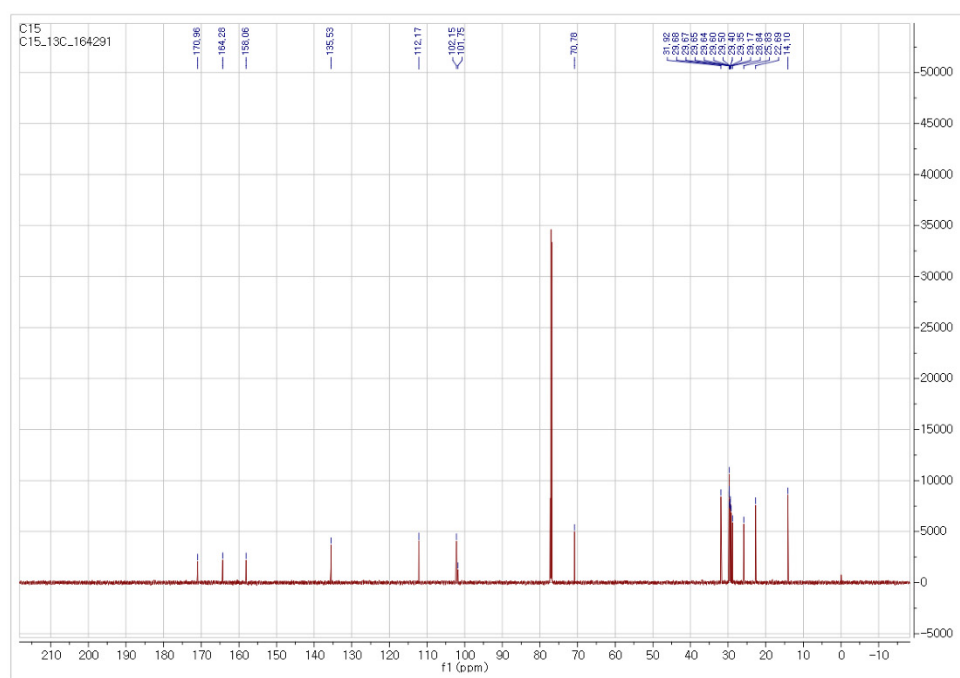

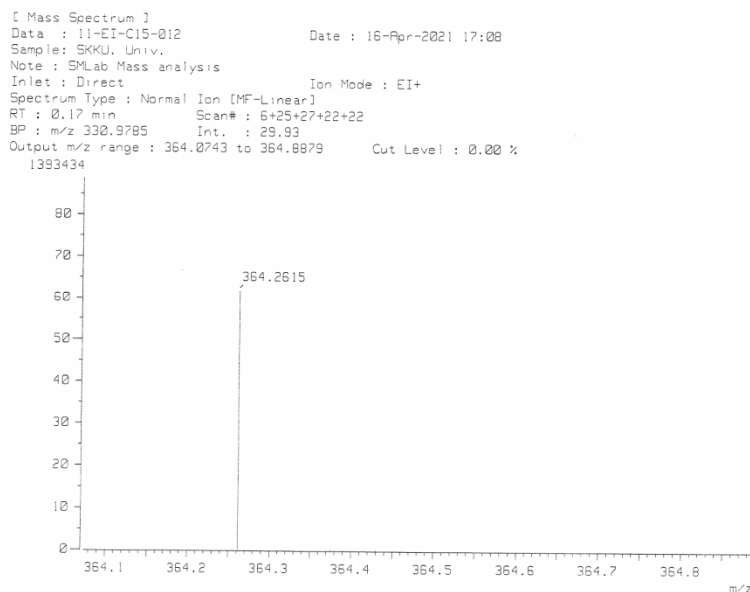

### HPLC data of 2-hydroxy-6-(pentadecyloxy)benzoic acid (1f).

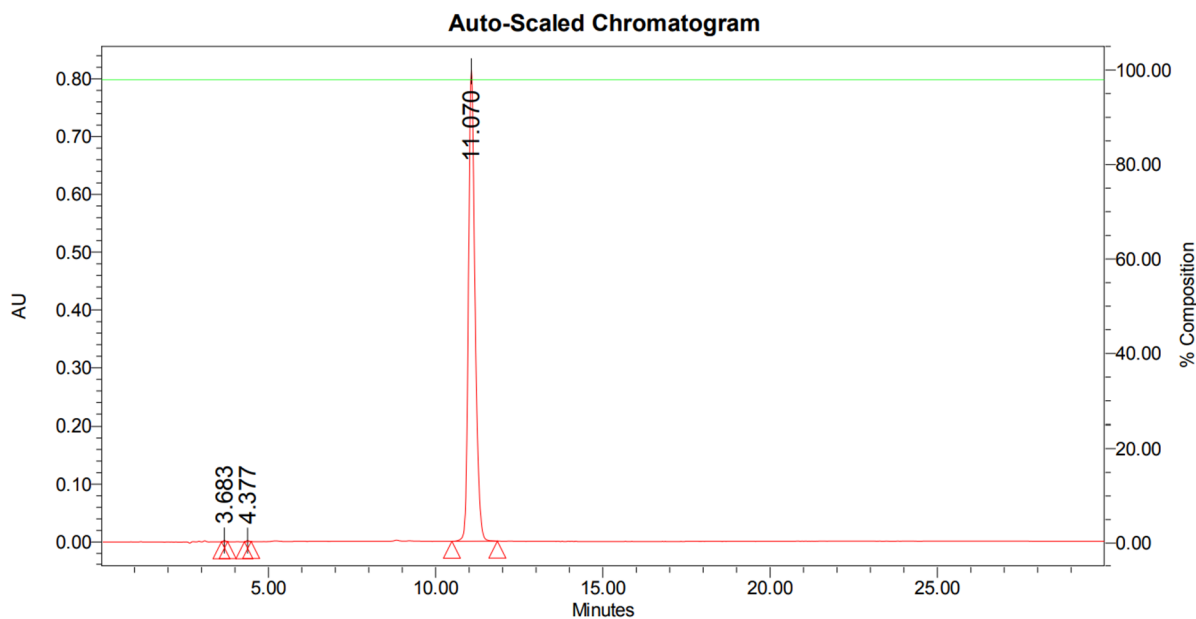

#### Processed Channel: PDA 254.0 nm

|   | Processed Channel | Retention Time (min) | Area     | % Area | Height |
|---|-------------------|----------------------|----------|--------|--------|
| 1 | PDA 254.0 nm      | 3.683                | 11423    | 0.10   | 2194   |
| 2 | PDA 254.0 nm      | 4.377                | 11196    | 0.10   | 1838   |
| 3 | PDA 254.0 nm      | 11.070               | 11107763 | 99.80  | 814090 |

### <sup>1</sup>H-NMR spectrum of 7-hydroxy-2,2-dimethyl-4H-benzo[d][1,3]dioxin-4-one (8).

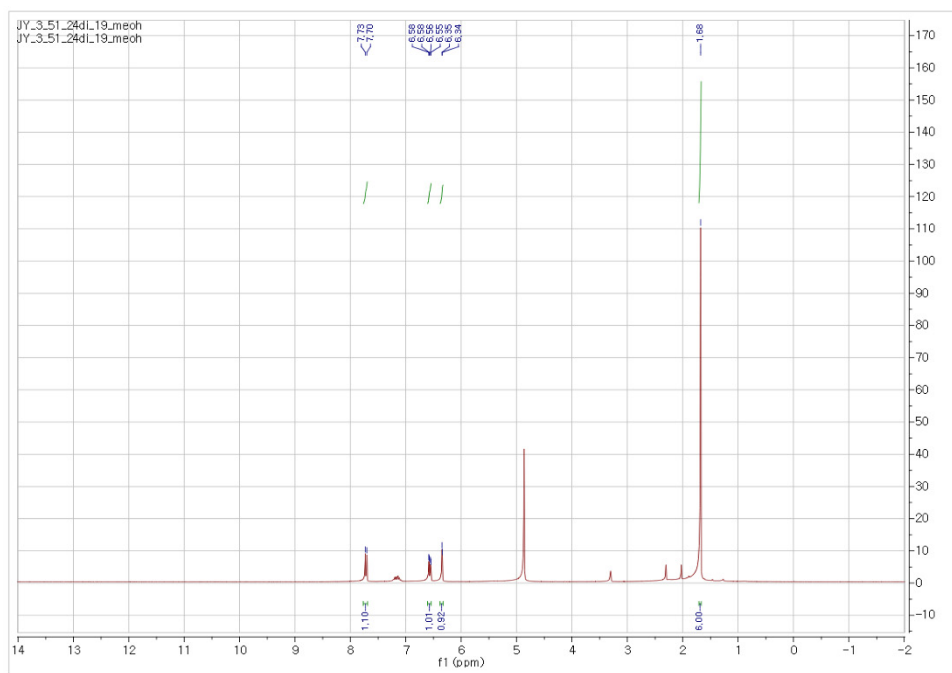

**<sup>13</sup>C-NMR spectrum of 7-hydroxy-2,2-dimethyl-4H-benzo[d][1,3]dioxin-4-one (8).**

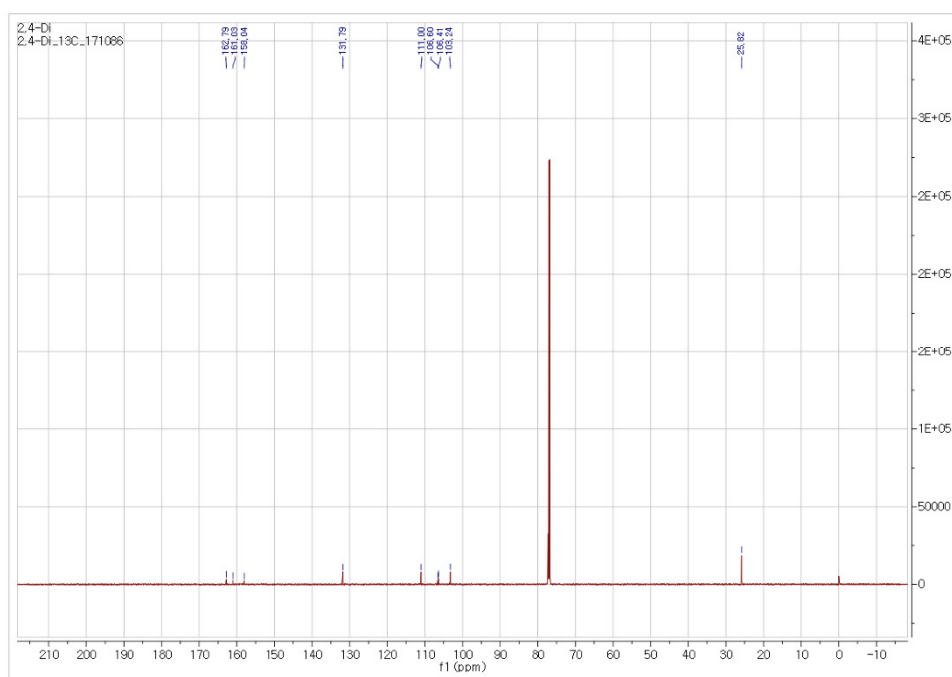

**HRMS spectrum of 7-hydroxy-2,2-dimethyl-4H-benzo[d][1,3]dioxin-4-one (8).**

[ Mass Spectrum ]  
 Data : HR-2-4-D1-016 Date : 09-Sep-2021 19:25  
 Sample: SKKU, Univ. Prof. Jung  
 Note : Shimadzu Mass analysis  
 Inlet : Direct Ion Mode : EI+  
 Spectrum Type : Normal Ion (MF-Linear)  
 RT : 0.70 min Scan# : 22  
 BP : m/z 194.0599 Int. : 25.47  
 Output m/z range : 139.0200 to 249.0200 Cut Level : 0.00 %

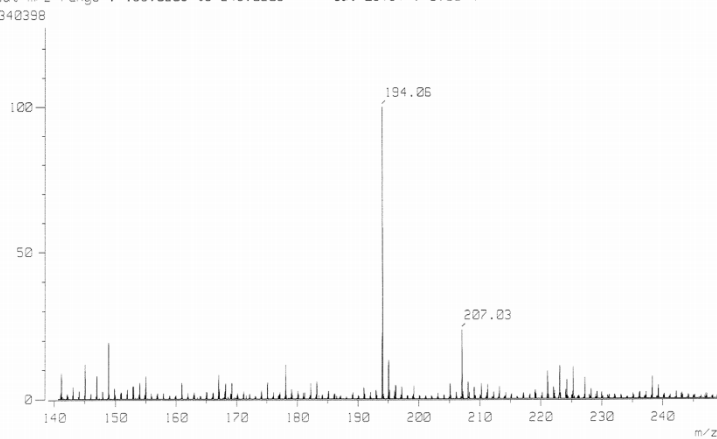

**<sup>1</sup>H-NMR spectrum of 2-hydroxy-4-(tridecyloxy)benzoic acid (2) .**

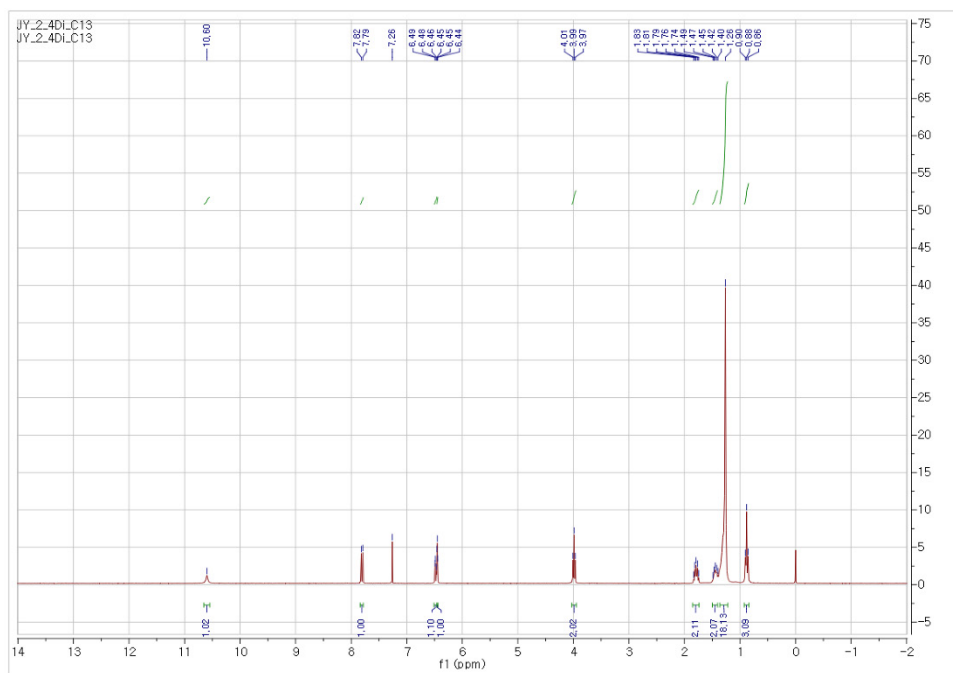

**$^{13}\text{C}$ -NMR spectrum of 2-hydroxy-4-(tridecyloxy)benzoic acid (2).**

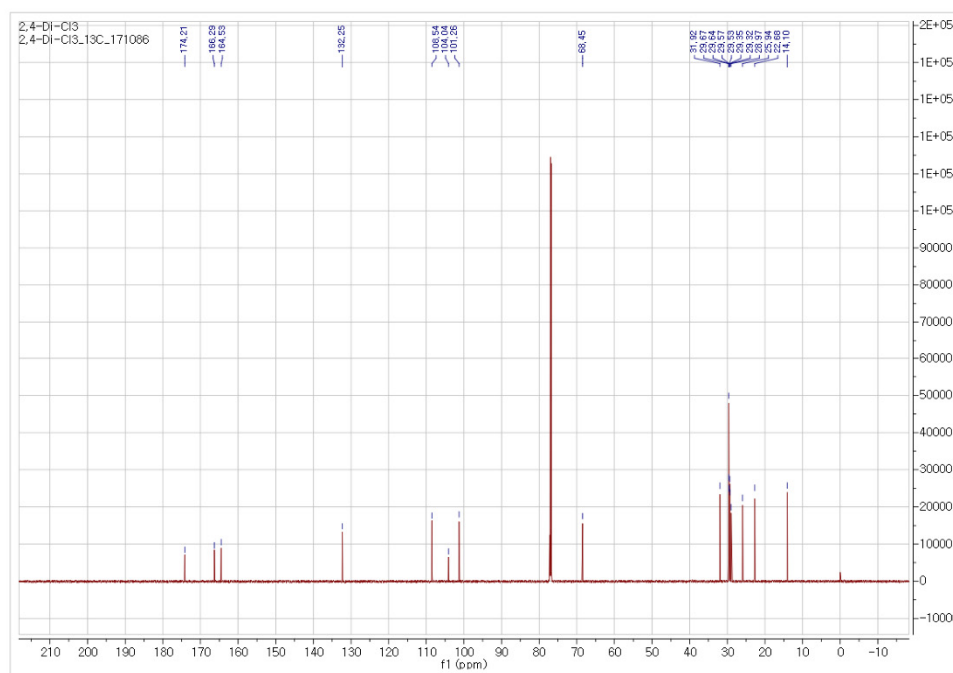

**HRMS spectrum of 2-hydroxy-4-(tridecyloxy)benzoic acid (2).**

[ Mass Spectrum ]  
 Data : HR-FAB-2-4-D1-C13-012 Date : 10-Sep-2021 16:21  
 Sample: SKKU. Univ. Prof. J  
 Note : SM Lab Research Center  
 Inlet : Reserv. Ion Mode : FAB+  
 Spectrum Type : Normal Ion [MF-Linear]  
 RT : 4.65 min Scan# : (139,142)+187  
 BP : m/z 307.0967 Int. : 86.08  
 Output m/z range : 337.1419 to 337.6164 Cut Level : 0.00 %

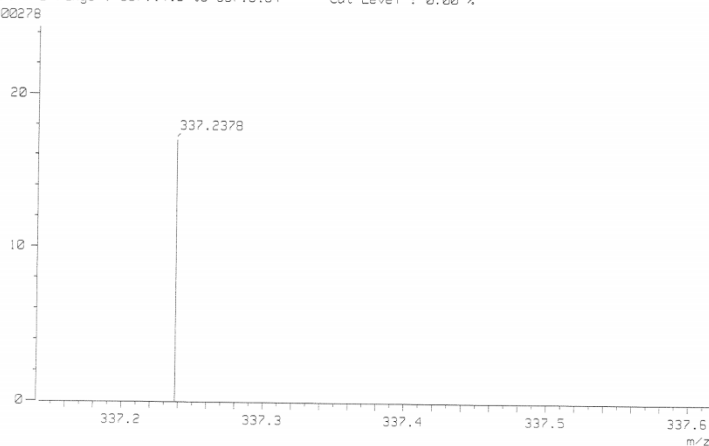

## HPLC data of 2-hydroxy-4-(tridecyloxy)benzoic acid (2).

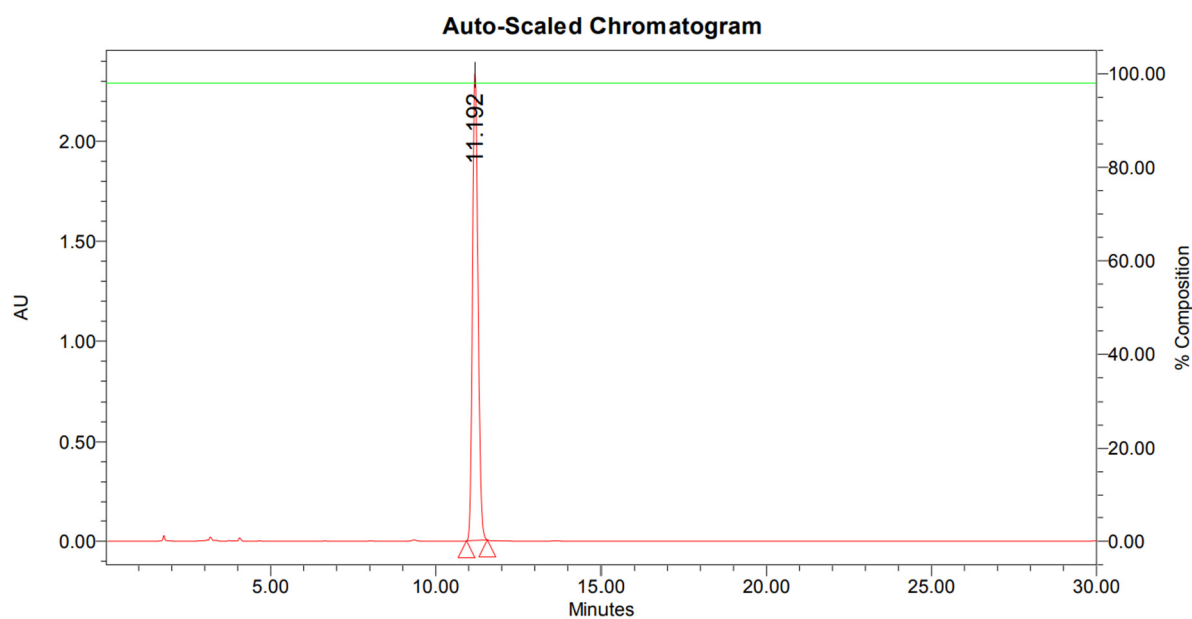

### Processed Channel: PDA 254.0 nm

|   | Processed Channel | Retention Time (min) | Area     | % Area | Height  |
|---|-------------------|----------------------|----------|--------|---------|
| 1 | PDA 254.0 nm      | 11.192               | 27346788 | 100.00 | 2346050 |

## <sup>1</sup>H-NMR spectrum of 6-hydroxy-2,2-dimethyl-4H-benzo[d][1,3]dioxin-4-one (11).

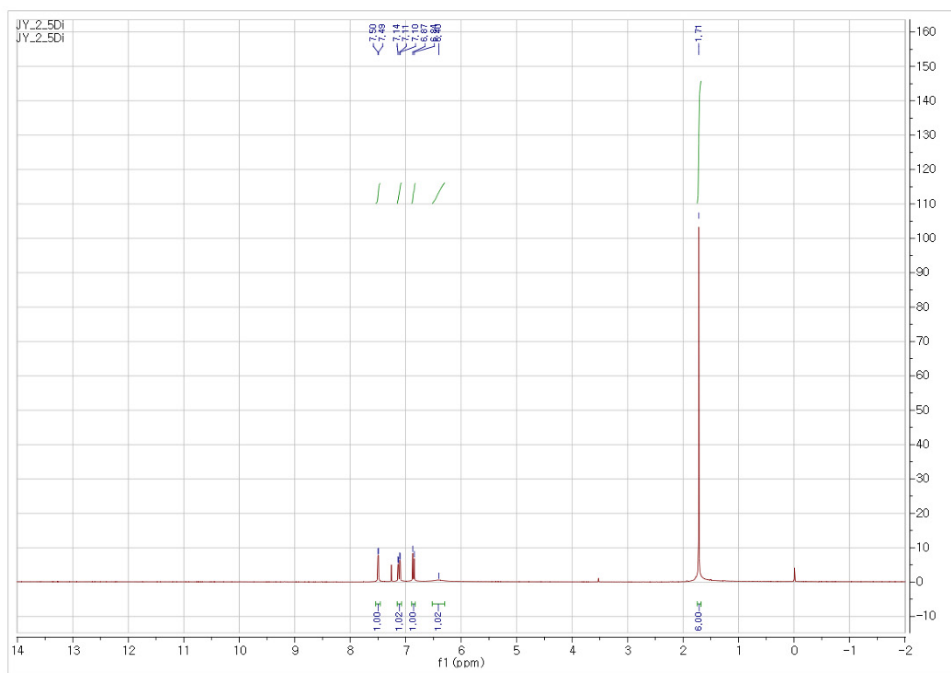

**<sup>13</sup>C-NMR spectrum of 6-hydroxy-2,2-dimethyl-4H-benzo[d][1,3]dioxin-4-one (11).**

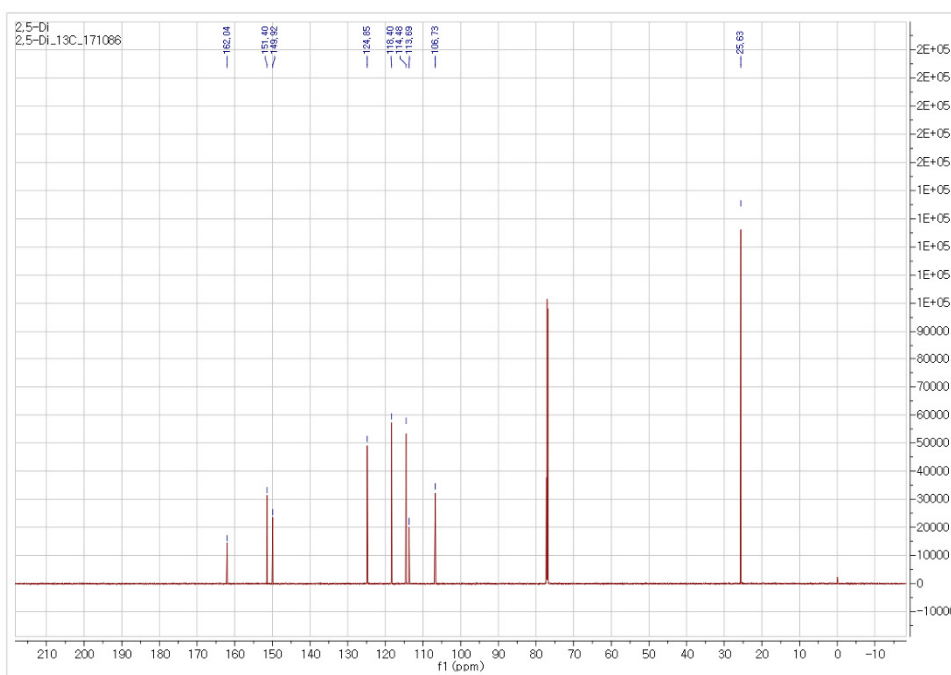

**HRMS spectrum of 6-hydroxy-2,2-dimethyl-4H-benzo[d][1,3]dioxin-4-one (11).**



[ Mass Spectrum ]  
Data : HR-2-5-Di-017 Date : 09-Sep-2021 19:28  
Sample: SKKU. Univ. Prof. Jung  
Note : SMLab Mass analysis  
Inlet : Direct Ion Mode : EI+  
Spectrum Type : Normal Ion [MF-Linear]  
RT : 1.04 min Scan# : 32+28+32+23  
BP : m/z 207.0354 Int. : 8.55  
Output m/z range : 193.8243 to 194.2292 Cut Level : 17.57 %  
375705

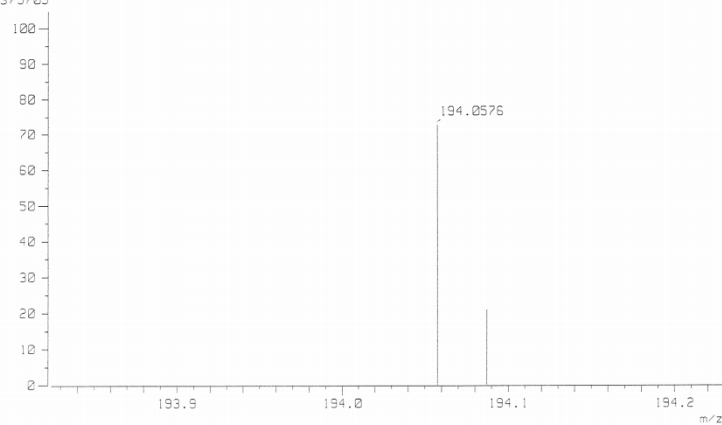

**$^1\text{H}$ -NMR spectrum of 2-hydroxy-5-(tridecyloxy)benzoic acid (3) .**

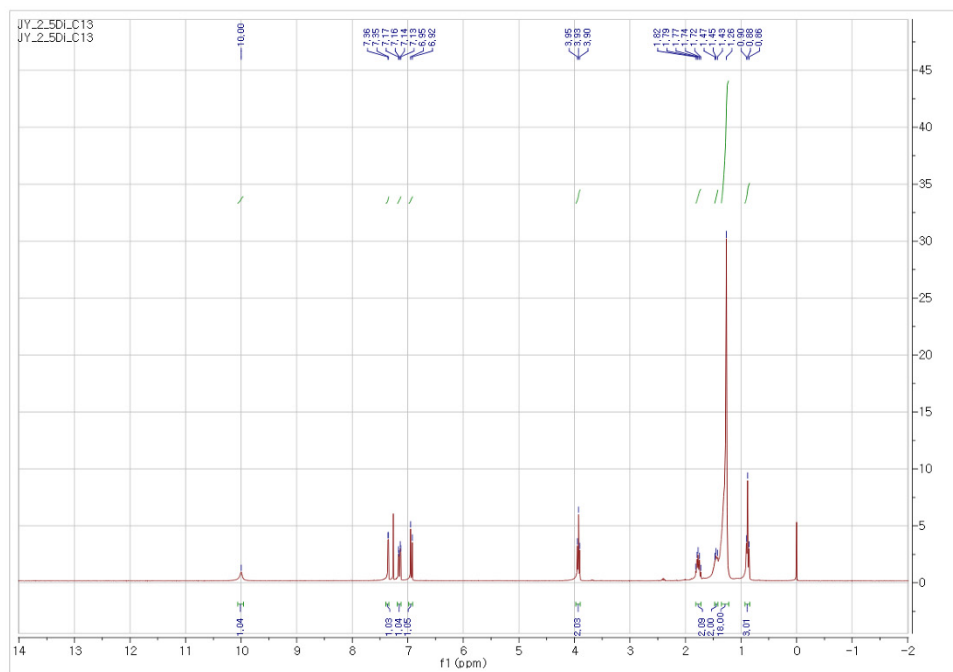

**$^{13}\text{C}$ -NMR spectrum of 2-hydroxy-5-(tridecyloxy)benzoic acid (3) .**

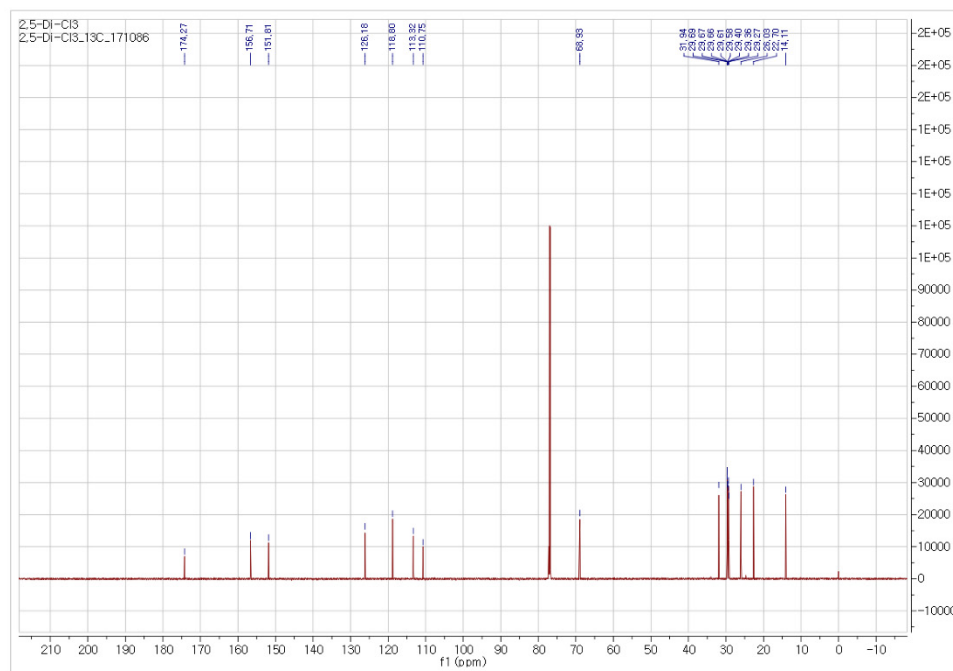

**HRMS spectrum of 2-hydroxy-5-(tridecyloxy)benzoic acid (3).**

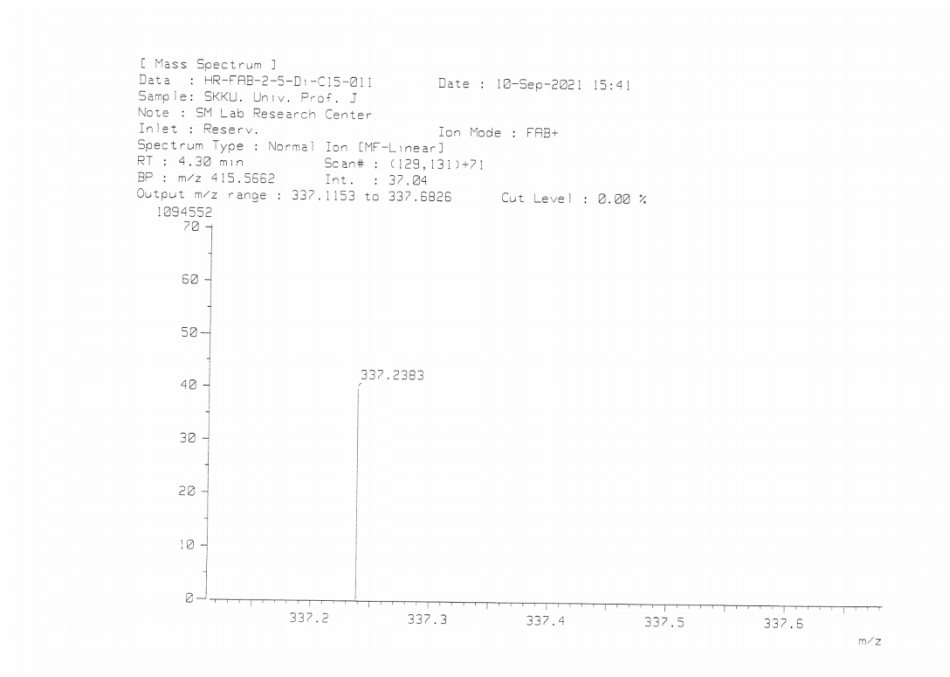

### HPLC data of 2-hydroxy-5-(tridecyloxy)benzoic acid (3).

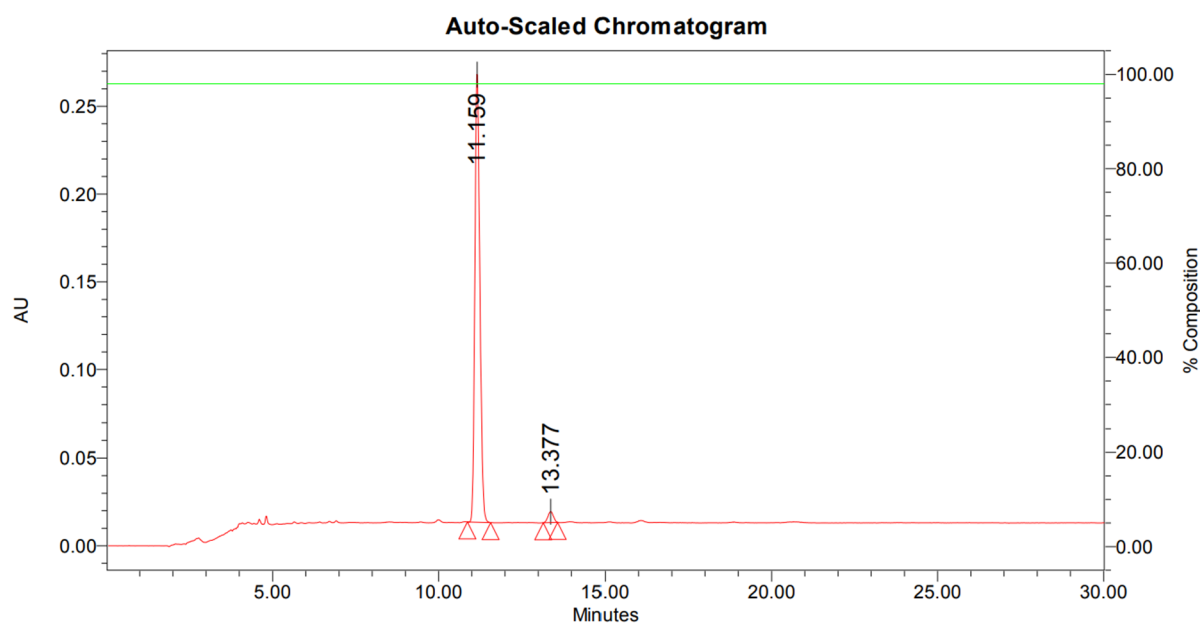

#### Processed Channel: PDA 254.0 nm

|   | Processed Channel | Retention Time (min) | Area    | % Area | Height |
|---|-------------------|----------------------|---------|--------|--------|
| 1 | PDA 254.0 nm      | 11.159               | 2683605 | 97.41  | 256634 |
| 2 | PDA 254.0 nm      | 13.377               | 71331   | 2.59   | 6241   |
